1 Homeostatic Plasticity Commonly Fails at the Intersection of Autism-Gene  
2 Mutations and a Novel Class of Common Phenotypic Modifier

3  
4  
5 Özgür Genç<sup>1</sup>, Joon Y. An<sup>2</sup>, Richard D. Fetter<sup>1</sup>, Yelena Kulik<sup>1</sup>, Giulia Zunino<sup>1</sup>, Stephan J.  
6 Sanders<sup>2</sup> and Graeme W. Davis<sup>1\*</sup>

7  
8 1. Department of Biochemistry and Biophysics  
9 Kavli Institute for Fundamental Neuroscience  
10 University of California, San Francisco  
11 San Francisco, CA 94158

12  
13 2. Department of Psychiatry  
14 UCSF Weill Institute for Neurosciences  
15 University of California, San Francisco  
16 San Francisco, CA 94158

17  
18 \*to whom correspondence should be addressed  
19 Graeme.davis@ucsf.edu

20  
21  
22 **ABSTRACT**

23 **We identify a set of common phenotypic modifiers that interact with five independent autism gene**  
24 **orthologs (*RIMS1*, *CHD8*, *CHD2*, *WDFY3*, *ASH1L*) causing a common failure of presynaptic**  
25 **homeostatic plasticity (PHP). Heterozygous null mutations in each autism gene are demonstrated to**  
26 **have normal baseline neurotransmission and PHP. However, we find that PHP is sensitized and**  
27 **rendered prone to failure. A subsequent electrophysiology-based genetic screen identifies the first**  
28 **known heterozygous mutations that commonly genetically interact with multiple ASD gene**  
29 **orthologs, causing PHP to fail. Two phenotypic modifiers identified in the screen, *PDPK1* and**  
30 ***PPP2R5D*, are characterized. Finally, transcriptomic, ultrastructural and electrophysiological**  
31 **analyses define one mechanism by which PHP fails; an unexpected, maladaptive up-regulation of**  
32 ***CREG*, a conserved, neuronally expressed, stress response gene and a novel repressor of PHP. Thus,**  
33 **we define a novel genetic landscape by which diverse, unrelated autism risk genes may converge to**  
34 **commonly affect the robustness of synaptic transmission.**

35  
36  
37 **Keywords:** Presynaptic homeostatic plasticity; PHP; synaptic homeostasis; homeostatic plasticity; autism  
38 spectrum disorder; ASD; synaptic transmission; chromatin remodeling; Rim; RIMS1; PDPK1; PPP2R5D;  
39 functional genomics; CREG; intellectual disability; CHD8; ASH1L; CHD2; WDFY3; chd1; Bchs; Kis

## 40 **Introduction**

41 Autism Spectrum Disorder (ASD) is a polygenic disorder with a complex underlying genetic etiology  
42 (Bourgeron, 2015). Advances in whole genome sequencing and genome-wide association studies have  
43 dramatically expanded our understanding of the genetic architecture of ASD. In particular, the  
44 identification of rare *de novo* mutations that confer high risk for ASD has generated new molecular  
45 insight (De Rubeis et al., 2014; Iossifov et al., 2014; Sanders et al., 2015). Yet, even in cases where a rare  
46 *de novo* mutation confers risk for ASD, additional processes are likely to contribute to the ASD  
47 phenotype including the engagement of adaptive physiological mechanisms that respond to the presence  
48 of an ASD risk associated gene mutation (Gaugler et al., 2014; Gibson, 2009; Hartman et al., 2001; Hou  
49 et al., 2019; Kitano, 2007; Plomp et al., 1992; Sackton and Hartl, 2016; Sardi and Gasch, 2018).

50 Homeostatic plasticity, in particular, has garnered considerable attention as an adaptive  
51 physiological process that might be relevant to the phenotypic penetrance of ASD mutations (Antoine et  
52 al., 2019; Bourgeron, 2015; Mullins et al., 2016; Nelson and Valakh, 2015; Ramocki and Zoghbi, 2008).  
53 Yet, very little is known at a mechanistic level regarding the interface of homeostatic plasticity and ASD  
54 genetics. There remains ongoing debate regarding whether homeostatic plasticity is normally induced or  
55 whether it is impaired in the context of rare *de novo* mutations that confer risk for ASD (Antoine et al.,  
56 2019; Bourgeron, 2015; Ramocki and Zoghbi, 2008). And, there is no mechanistic information regarding  
57 how rare *de novo* mutations that confer risk for ASD might be connected to the signaling mechanisms that  
58 are essential for the induction and expression of homeostatic plasticity.

59 It is well established that homeostatic signaling systems function throughout the central and  
60 peripheral nervous systems to stabilize neural function following a perturbation that can be of genetic,  
61 immunological, pharmacological or environmental origin (Davis, 2006; Marder, 2011; Turrigiano, 2011).  
62 Evidence for this has accumulated by measuring how nerve and muscle respond to the persistent  
63 disruption of synaptic transmission, ion channel function or neuronal firing. In systems ranging from  
64 *Drosophila* to human, cells have been shown to restore baseline function in the continued presence of  
65 these perturbations by rebalancing ion channel expression, modifying neurotransmitter receptor  
66 trafficking and modulating neurotransmitter release (Davis, 2013; Hengen et al., 2013; Maffei and  
67 Fontanini, 2009; Watt and Desai, 2010). There is evidence that homeostatic signaling systems function at  
68 the level of individual cells and synapses (Davis, 2013). There is also evidence that homeostatic signaling  
69 systems influence the function of neural circuitry (Deeg and Aizenman, 2011; Hengen et al., 2013; Maffei  
70 and Fontanini, 2009; Nelson and Valakh, 2015).

71 We set out to determine whether there exists a molecular interface between mutations in ASD  
72 gene orthologs in *Drosophila* and the induction or expression of presynaptic homeostatic plasticity.  
73 Presynaptic homeostatic plasticity (PHP) is an evolutionarily conserved form of homeostatic plasticity,



74 observed in *Drosophila*, mice and humans (Davis, 2013). PHP has been documented at both central and  
75 peripheral synapses in response to differences in target innervation (Liu and Tsien, 1995) altered  
76 postsynaptic excitability (Davis, 2006; Marder and Goaillard, 2006; Mullins et al., 2016), following  
77 chronic inhibition of neural activity (Kim and Ryan, 2010; Zhao et al., 2011) and following disruption of  
78 postsynaptic neurotransmitter receptor function (Henry et al., 2012; Jakawich et al., 2010). The  
79 mechanisms of PHP have a remarkable ability to modulate and stabilize synaptic transmission, with an  
80 effect size that can exceed 200% (Müller and Davis, 2012; Ortega et al., 2018).

81 Many of the rare *de novo* mutations that confer high risk for ASD are considered to be  
82 heterozygous loss of function (LOF) mutations (Bourgeron, 2015; De Rubeis et al., 2014; Iossifov et al.,  
83 2014; Sanders et al., 2015). Therefore, we examine the phenotype of heterozygous LOF mutations in five  
84 different ASD gene orthologs. We make several fundamental advances. First, we demonstrate that these  
85 individual heterozygous LOF mutations have no overt effect on baseline transmission or PHP. However,  
86 we demonstrate that PHP is sensitized to failure. Next, we sought to define the molecular mechanisms  
87 that connect ASD gene orthologs to the mechanisms of PHP. A genome-scale screen and subsequent  
88 systems-genetic analyses yielded unexpected insight. We do not simply identify genes that, when mutated,  
89 enhance the phenotype of individual ASD gene mutations. We discovered genes that, when their function  
90 is diminished by heterozygous LOF mutations, *commonly modify* multiple ASD gene orthologs, causing a  
91 selective failure of homeostatic plasticity. Thus, we define the first class of common phenotypic modifiers  
92 of ASD genes in any system. Finally, we do not stop with the identification of a novel class of ASD gene  
93 modifiers. We proceed to characterize *how* homeostatic plasticity fails in one such condition. The  
94 mechanism we discovered is also unexpected and illuminates the complexity by which double  
95 heterozygous gene-gene interactions can generate a cellular or organismal phenotype. We demonstrate  
96 maladaptive, enhanced expression of a gene known as *Cellular Repressor of E1A Stimulated Genes*  
97 (*CREG*), a gene that is conserved from *Drosophila* to human and expressed in the brain (Yang et al.,  
98 2011).

99 Taken together, we define a novel, unexpected genetic architecture that connects heterozygous  
100 LOF mutations in ASD-associated gene orthologs with the mechanisms of homeostatic plasticity. In  
101 particular, the observation that PHP is commonly sensitized by multiple, different ASD genes, and the  
102 fact that we identify and characterize common phenotypic modifiers of five different ASD genes, defines  
103 a novel means by which a diversity of ASD-associated risk genes may converge to affect synaptic  
104 transmission. We propose that this information may be relevant to new therapeutic approaches that might  
105 someday modify ASD phenotypic severity, regardless of the underlying genetic mutation(s) that confer  
106 risk for ASD.

107

108

## 109 **Results**

110 We began an investigation of ASD gene orthologs in *Drosophila* by acquiring heterozygous null  
111 mutations in five genes; *RIMS1*, *CHD8*, *CHD2*, *WDFY3* and *ASHIL* (Figure 1A; Note: throughout we use  
112 the human nomenclature). Heterozygous null mutations were analyzed, as opposed to use of RNAi-  
113 mediated gene knockdown, in order to more precisely reflect the proposed genetic perturbations in human.  
114 All five of these genes are considered high confidence ‘category 1’ ASD-associated genes based on  
115 SFARI Gene (Simons Simplex Collection, 2020). All five of these genes have clear *Drosophila* orthologs.  
116 Further, we demonstrate that all five genes are expressed in *Drosophila* third instar motoneurons based on  
117 a Patch-Seq analysis of gene expression (Figure S1). The five ASD gene orthologs were also chosen to  
118 reflect a broad range of biological activities that are associated with the numerous ASD-associated genes  
119 identified to date. The *RIMS1* gene is a synaptic scaffolding protein that localizes to and organizes sites of  
120 neurotransmitter release, termed active zones. The *CHD8* and *CHD2* genes encode chromatin remodeling  
121 factors that localize to the cell nucleus. *WDFY3* encodes a phosphatidylinositol 3-phosphate-binding  
122 protein and regulator of autophagy and intracellular signaling. *ASHIL* encodes a member of the trithorax  
123 group of transcriptional activators and is found in the cell nucleus. A survey of biochemical and genetic  
124 interaction networks in *Drosophila* demonstrates no known interactions among these five genes (Flybase).  
125 In humans, there appear to be no known direct biochemical interactions among these genes. Yet,  
126 heterozygous LOF mutations in each of these genes are associated with risk for ASD in humans.

127

### 128 **Heterozygous ASD gene mutations have normal synaptic transmission and PHP**

129 We analyzed baseline neurotransmission and presynaptic homeostatic plasticity (PHP) at the *Drosophila*  
130 neuromuscular junction (NMJ) as a model glutamatergic synapse. At the *Drosophila* NMJ, PHP is  
131 induced by application of sub-blocking concentrations of the postsynaptic glutamate receptor antagonist  
132 philanthotoxin-433 (PhTx; 5-10 $\mu$ M), diminishing the average postsynaptic depolarization caused by the  
133 release of single synaptic vesicles (miniature excitatory postsynaptic potential; mEPSP). Decreased  
134 mEPSP amplitude initiates a potentiation of presynaptic neurotransmitter release that precisely offsets the  
135 magnitude of the PhTx perturbation and, thereby, maintains evoked excitatory postsynaptic potential  
136 amplitude (EPSP) at baseline levels prior to the application of PhTx (Figure 1B-E) (Davis, 2013; Frank et  
137 al., 2009).

138 First, we characterized baseline synaptic transmission and the rapid induction of PHP in  
139 heterozygous null mutations of all five ASD-associated genes, defined above. We find no significant  
140 change in baseline neurotransmission, including average mEPSP amplitude, average EPSP amplitude and  
141 quantal content (Figure 1B-E). Following application of PhTx, we find that heterozygous null mutations

142 in all five ASD gene orthologs do not alter the expression of PHP (Figure 1B-E). Specifically, PhTx  
143 significantly diminished the average mEPSP amplitude in each heterozygous mutant and induced a  
144 statistically significant increase in quantal content that restored EPSP amplitudes toward wild type values.  
145 We conclude that all five heterozygous mutations express normal PHP.

146

#### 147 **Genetic interaction of *RIMS1* with *CHD8* and with *ASH1L* causes PHP to fail.**

148 Tests of genetic interaction are commonly used to determine if two genes have a function that converges  
149 on a specific biological process. While genetic interactions cannot be interpreted to reflect participation in  
150 a linear signaling pathway, such an analysis can define signaling relationships among genes that are  
151 independent of whether the encoded proteins interact biochemically. Thus, genetic interactions have been  
152 a powerful means to explore new signaling systems in model organisms, an approach that is being  
153 increasingly utilized in cancer biology (Ashworth et al., 2011; Mair et al., 2019; Chan et al., 2011; O’Neil  
154 et al., 2017; Baetz et al., 2004; Bharucha et al., 2011). One approach, formally termed ‘*second site non-*  
155 *complementation* (SSNC)’ or ‘*non-allelic non-complementation*’, is particularly powerful when a gene of  
156 interest is essential for cell or organismal viability, such as *CHD8* and *CHD2*. In brief, if two  
157 heterozygous null mutations, each having no observable phenotype when tested alone, create a phenotype  
158 when combined in a single organism, then the genes are said to genetically interact according to SSNC.  
159 We apply this approach here.

160 The *Drosophila RIMS1* ortholog was previously demonstrated to be a central component of the  
161 presynaptic machinery necessary for PHP (Müller et al., 2012). Genetic interactions with heterozygous  
162 null mutations in *Drosophila RIMS1* have been used to link genes to the mechanism of PHP (Harris et al.,  
163 2018; Hauswirth et al., 2018; Ortega et al., 2018). First, we confirm that PHP is robustly expressed in the  
164 *RIMS1/+* heterozygous null mutant (Figure 1E-G). The average magnitude of homeostatic compensation  
165 is indistinguishable from wild type ( $p>0.1$ ). When we plot the relationship between mEPSP amplitude  
166 and quantal content for every individual recording, there is a strong negative correlation observed in both  
167 wild type ( $R^2=0.66$ ) and *RIMS1/+* ( $R^2=0.64$ ) (Figure 1F and G, respectively).

168 Next, we analyzed the heterozygous *CHD8/+* mutant, which also shows robust PHP (Figure 1C-  
169 E) and a strong negative correlation between mEPSP amplitude and quantal content ( $R^2=0.75$ ; Figure 1H,  
170 gray points and black line). However, animals harboring heterozygous mutations in both *RIMS1* and  
171 *CHD8* (*CHD8/+; RIMS1/+*) show a complete failure of PHP (Figure 1H). The correlation of mEPSP  
172 amplitude and quantal content is abolished (Figure 1H, red points and red line;  $R^2=0.01$ ). The percent  
173 homeostasis in the double heterozygote is decreased to less than 10%, not statistically different from  
174 baseline (Figure 1H, box;  $p=0.6$ ), and highly statistically different from both *CHD8/+* and *RIMS1/+* alone  
175 ( $p<0.01$ ). We conclude that *CHD8* can be linked, directly or indirectly, to the mechanisms of PHP. We

176 propose that the heterozygous LOF mutation in *CHD8* weakens the robustness of PHP, thereby  
177 associating an ASD-associated chromatin remodeling factor with homeostatic mechanisms that ensure  
178 robust synaptic transmission.

179         Next, to test the generality of this effect, we created double heterozygous mutant combinations of  
180 *RIMS1*/+ with the remaining ASD orthologs that we examine in this study (*ASHIL*, *CHD2* and *WDFY3*)  
181 (Figure S2). The *ASHIL*/+, *RIMS1*/+ double heterozygous animal shows a complete failure of PHP  
182 (Figure S2B). The percent PHP expression is decreased from 152% in the *ASHIL*/+ mutant, to 114% in  
183 the double heterozygote, which is not different from baseline ( $p=0.2$ ) and represents a highly significant  
184 suppression ( $p<0.01$ ) compared to the *ASHIL*/+ mutant alone ( $p<0.01$ ) (Figure S2B). A similar analysis  
185 of the *CHD2*/+; *RIMS1*/+ double heterozygous animal shows a significant suppression of PHP ( $p=0.01$ ),  
186 although significant PHP remains expressed in the double heterozygous animals (Figure S2C). Finally,  
187 the *WDFY3*/+; *RIMS1*/+ double heterozygous animal shows robust PHP (Figure S2D) that is  
188 indistinguishable from either the *WDFY3*/+ or the *RIMS1*/+ single heterozygotes. Taken together, these  
189 results suggest that there may be an unexpected connection between three unrelated ASD gene orthologs  
190 (*CHD8* and *CHD2* and *ASHIL*) and the mechanisms of PHP, given that all three genes interact with  
191 *RIMS1*. Based on these data, we pursued a genome-scale forward genetic screen to interrogate and better  
192 define the molecular interface of these ASD gene orthologs and the rapid induction of PHP.

193

#### 194 **Forward genetic screen for altered baseline transmission and PHP**

195 The screen that we performed is diagrammed in Figure 2A. We took advantage of a collection of small  
196 chromosomal deficiencies (5-50 genes per deficiency, each with known chromosomal breakpoints; listed  
197 in Supplemental Table 1) that tile the 3<sup>rd</sup> chromosome, uncovering approximately 6000 genes in total. For  
198 every double heterozygous combination of *RIMS1*/+ with a heterozygous deficiency, we performed  
199 multiple ( $n=3-15$ ) intracellular recordings, quantifying mEPSP amplitude, EPSP amplitude, quantal  
200 content (EPSP/mEPSP), resting membrane potential and input resistance. Recordings were made in the  
201 presence of PhTx to induce PHP. If the baseline EPSP is normal and quantal content is increased  
202 compared to wild type, then we can conclude that PHP is normally expressed. In these instances, we  
203 expect that baseline transmission was also normal in the absence of PhTx. However, if EPSPs are  
204 diminished in a given genetic combination (*RIMS1*/+, *Df*/+) and quantal content is not increased  
205 compared to wild type, then there are two possible origins: 1) the double mutant impairs baseline  
206 transmission or 2) baseline transmission is normal and PHP is selectively impaired. In these instances, the  
207 double heterozygous mutant combinations were re-assessed in the absence of PhTx to test for altered  
208 baseline transmission.

209         Double heterozygous combinations that strongly affected muscle resting potential or input

210 resistance were not observed. We uncovered two instances where a mutant combination (*RIMS1/+*, *Df/+*)  
211 caused a specific deficit in baseline transmission, without altering PHP. We did not isolate any double  
212 heterozygous conditions with dramatic defects in mEPSP amplitude. The majority of double mutant  
213 combinations specifically affected the expression of PHP. This was unexpected.

214 Double mutant combinations were determined to disrupt PHP by satisfying one of two criteria.  
215 First, the average quantal content (+PhTx) had to be more than one standard deviation below the  
216 population mean of all genotypes (Figure 2B, solid horizontal black line). Second, average quantal  
217 content had to reside outside a boundary that encompasses 95% of all individual recordings made in the  
218 *RIMS1/+* mutant alone (Figure 2B, black dashed lines). Two example ‘hits’ are shown in red (Figure 2B;  
219 dark red point shows data in the absence of PhTx and light red point shows data recorded in the presence  
220 of PhTx, and the red lines simply connect the points for a given genotype for the purposes of data display).  
221 We also present a complete data set for a single hit from the screen as a standard format bar graph with  
222 representative traces (Figure 2D, E). Note that the heterozygous deficiency has normal baseline  
223 transmission and PHP ( $p > 0.1$  One-way ANOVA with post-hoc Tukey multiple comparison), but when  
224 combined with a heterozygous mutation in *RIMS1*, PHP completely and selectively fails.

225 In total, our screen identified, and we subsequently confirmed, 20 small deficiencies that cause  
226 PHP to fail when combined with *RIMS1/+*. The identified deficiencies are randomly distributed across the  
227 3<sup>rd</sup> chromosome (Figure 2C). The screen was empirically validated by the identification, blind to  
228 genotype, of deficiencies that uncovered the *RIMS1* locus, as well as the *Pi3K68D* locus (not included in  
229 hit list), previously shown to interact as a double heterozygous mutant with *RIMS1/+* (Hauswirth et al.,  
230 2018). Furthermore, the *rim binding protein* (RBP) locus was not identified as disrupting PHP, consistent  
231 with the previously published observation that a *rbp/+* mutant does not interact with *RIMS1/+* for PHP  
232 (Müller et al., 2015). However, *rbp/+* did interact with *RIMS1/+* for baseline neurotransmitter release as  
233 expected based on previously published data (not shown) (Müller et al., 2015). No other genes previously  
234 implicated in the mechanisms of PHP were present in the deficiencies isolated in our screen. It is  
235 important to note that, according to a formal genetic analysis, no strong conclusion can be made regarding  
236 the negative result of a double heterozygous genetic interaction.

237 Finally, we assessed whether there was any relationship between the number of genes that were  
238 deleted within a given deficiency and the robustness of PHP. One hypothesis is that the additive effects of  
239 multiple, heterozygous gene mutations would increase for larger deficiencies and PHP would be  
240 increasingly compromised. That was not the case (Figure 3). There was no correlation between the  
241 number of genes uncovered by a given deficiency and EPSP amplitude recorded in the presence of PhTx  
242 ( $R^2 = 0.003$ ; Figure 3A). Thus, impaired PHP cannot be accounted for by a simple additive accumulation  
243 of genetic mutations within a given deficiency.

244

## 245 **Identification of common phenotypic enhancers of multiple unrelated ASD genes**

246 The results of our forward genetic screen, encompassing approximately one third of the  
247 *Drosophila* genome, might identify genetic interactions specific to *RIMS1*. However, we reasoned that  
248 because *RIMS1* also showed a strong genetic interaction with *CHD8*, as well as *CHD2* and *ASH1L*  
249 (Figure 1; Figure S2), a portion of the hits from our screen might also interact with these genes. When  
250 initial experiments confirmed that this was the case, we expanded our analysis to encompass all five of  
251 the ASD-associated gene orthologs from Figure 1. Thus, we performed a systems-genetic test of all  
252 possible double heterozygous genetic interactions, using wild type and the five ASD gene orthologs  
253 introduced in Figure 1 combined with wild type and five hits (deficiencies) randomly selected from our  
254 forward genetic screen. In total, we tested 36 genetic combinations for baseline transmission and PHP,  
255 recording every genotype in the presence and absence of PhTx (Figure 4).

256 To facilitate visual interpretation, genetic interaction data are presented as a heat map  
257 superimposed on a matrix representing all genetic combinations, in the presence or absence of PhTx  
258 (Figure 4A). All but one genotype responded to the application of PhTx with decreased mEPSP  
259 amplitudes (Figure 4A, mEPSP; compare top left matrix with top right matrix, the transition from blue to  
260 red indicates diminished average mEPSP for each genetic combination). Thus, we induced homeostatic  
261 pressure in 35 out of 36 genetic combinations (*CHD8/+* with *Df(3)7562/+* being the exception). Next, we  
262 demonstrate that all heterozygous deficiencies (x-axis) or heterozygous ASD-associated gene mutations  
263 (y-axis), when crossed to the wild type strain (*w1118*) showed normal EPSP amplitudes in the absence  
264 and presence of PhTx, demonstrating robust induction of PHP (Figure 4A, EPSP, bottom right matrix).  
265 Next, nearly all (23 out of 25) of the double heterozygous combinations show normal EPSP amplitudes in  
266 the absence of PhTx, demonstrating normal baseline neurotransmission (Figure 4A, bottom left matrix).  
267 However, a majority (16 of 25) of the double heterozygous genetic combinations showed a failure of PHP  
268 in the presence of PhTx (Figure 4A, red and light-red boxes, bottom right matrix). In Figure 4B, we also  
269 plot the induction of PHP for each double heterozygous combination by calculating the percent change in  
270 quantal content following PhTx application (Figure 4B, top matrix). Here, if quantal content does not  
271 change (<15% change; gray), then PHP is impaired or blocked. Moderate increases in quantal content  
272 (15-30% change; light orange) suggest suppression of PHP, in some instances being statistically  
273 significant suppression (see below).

274 We performed statistical analyses for each double mutant combination, asking whether there was  
275 a statistically significant increase in quantal content for a given double mutant in the presence of PhTx  
276 compared to that same double mutant combination in the absence of PhTx (Figure 4B, bottom matrix.)  
277 Note that we are testing whether PHP is induced in a given double heterozygous mutant combination (an



278 individual square in the matrix), comparing quantal content in the absence and presence of PhTx. We do  
279 not compare PHP expression among different double heterozygous mutant combinations. The colors gray  
280 and ‘light pink’ each reflect a complete block of PHP, an effect that is observed in the majority of double  
281 mutant combinations. As a complementary statistical analysis, we tested the differences between  
282 individual genotypic conditions (quantal content in each box) versus the wild type quantal content (One-  
283 way ANOVA with Dunnett’s multiple comparisons) (Figure S3). In this case, if PHP is blocked, then  
284 there will be a statistically significant difference compared to wild type. Again, 18 of 25 comparisons are  
285 significantly different. The genotypic comparison against wild type verified the analysis based on  
286 individual genotypic comparisons (Figure 4B). It should be noted that, in a few instances, minor  
287 differences were observed caused by a change in quantal content that was significant (-/+PhTx), but  
288 which remained smaller compared to wild type and therefore became significant. Thus, comparisons  
289 within genotypes (-/+PhTx) seem to assess the presence or absence of PHP most accurately (Figure 4B).

290 Our data demonstrate that four out of five deficiencies, isolated in our forward genetic screen as  
291 interacting with *RIMS1*, also cause PHP to fail when combined with any one of four different  
292 heterozygous ASD-associated gene mutations (Figure 4B, bottom). The pattern of PHP blockade is not  
293 uniform. *WDFY3*, *CHD8* and *CHD2* show a common pattern of interactions with the same three  
294 deficiencies. However, *ASHIL* interacts with only two out of the five tested deficiencies. Notably, the five  
295 ASD gene orthologs do not share any known common biological activity. Therefore, the identification of  
296 common genetic modifiers is completely unexpected. To our knowledge, this is the first demonstration, in  
297 any system, of common phenotypic enhancement for multiple, independent and unrelated ASD gene  
298 orthologs.

299 In Figure 4C-F, we elaborate on three of the genetic interactions with data presentations that are  
300 more detailed. We show evidence of normal PHP in *CHD8/+* (Figure 4C, replicated from Figure 1). In  
301 the adjacent graph (Figure 4C, right), we show evidence of a strong disruption of PHP in the double  
302 heterozygous combination of *CHD8/+* with a heterozygous deficiency (*Df(3)24410/+*) isolated in genetic  
303 screen. A similar analysis is presented for the *ASHIL/+* heterozygous gene mutation and the interaction  
304 with a different heterozygous deficiency (Figure 4D). Finally, a third genetic interaction is presented in a  
305 format that is standard for the field of homeostatic plasticity (Figure 4E, F), inclusive of representative  
306 traces (Figure 4E) and bar graphs with associated statistical analyses (Figure 4F). Note that values for all  
307 recordings are presented (Table S2). Several additional controls were performed to validate and extend  
308 the findings reported for our genetic interaction data set. First, we note that all double heterozygous  
309 mutant combinations are adult viable. Thus, it was possible to inspect adult animals for phenotypes that  
310 might indicate altered signaling. Inspection of the compound eye and wings (bristles, wing veins and size)  
311 demonstrate wild type tissue morphogenesis (data not shown).



312

313 ***PDPK1* and *PPP2R5D* are common phenotypic enhancers of multiple ASD gene orthologs**

314 We isolated the causal single gene mutations within two of the deficiencies isolated from our  
315 screen. To do so, we tested smaller sub-deficiencies that mapped within the originally isolated  
316 deficiencies. Sub-deficiency mapping either identified the causal gene, or a limited number of candidates.  
317 We subsequently tested individual gene candidates with established single gene mutations or RNAi. The  
318 process of mapping to single genes, therefore, included several rounds of independent phenotype  
319 verification. The first two instances in which we have isolated single causal genes are presented. Each  
320 candidate gene was tested individually against all five ASD gene orthologs, using previously published  
321 mutations (Figure 5). For both genes, we confirmed the same set of genetic interactions that occurred  
322 when analyzing the deficiency that included the identified gene (Figure 5).

323 The first gene that we identified encodes a serine threonine kinase encoded by the *PDPK1* gene  
324 (*PDK1* in *Drosophila*). *PDPK1* is a master controller of cellular metabolism, as well as cellular and  
325 synaptic growth at the *Drosophila* NMJ (Cheng et al., 2011). The second gene encodes a regulatory  
326 subunit of the PP2A phosphatase encoded by the *PPP2R5D* gene (*wrd* in *Drosophila*) (Viquez et al.,  
327 2006). *PPP2R5D* is also a master controller of cellular metabolism (Bernal et al., 2014), as well as  
328 cellular and synaptic growth at the *Drosophila* NMJ (Viquez et al., 2006). Both proteins are present at the  
329 *Drosophila* NMJ (Cheng et al., 2011; Viquez et al., 2009, 2006) Single-cell Patch-Seq experiments  
330 confirmed the expression of these genes in *Drosophila* motoneurons at third-instar (Figure S1).  
331 Intriguingly, the *PPP2R5D* gene has recently been associated with intellectual disability and autism in  
332 human (Loveday et al., 2015; Shang et al., 2016).

333 Next, we demonstrate that both genes, *PDPK1* and *PPP2R5D*, are common modifiers of multiple  
334 heterozygous ASD-associated gene mutations (Figure 5). To underscore the specificity of the double  
335 heterozygous genetic interactions (Figure 5B, E), we restored the expression of the *CHD2* gene to wild  
336 type levels in the *CHD2/+; PPP2R5D/+* double heterozygous combination. This was achieved using a  
337 previously published translocation of the *CHD2* gene locus that allowed us to put back one copy of the  
338 *CHD2* gene (*CHD2<sup>WT</sup>/+*) in the background of the *CHD2/+; PPP2R5D/+* double mutant. We demonstrate  
339 that PHP is fully restored (Figure 5C). An identical series of experiments was performed with a  
340 previously characterized *PDPK1* mutation (Figure 5E, F). Thus, *PDPK1* and *PPP2R5D* represent the first  
341 known common phenotypic modifiers of ASD gene orthologs, causing PHP to fail. The data also  
342 underscore that deficiencies isolated in our forward genetic screen can be resolved to the activity of single  
343 genes. As such, the screen may have identified a novel class of common phenotypic modifier.

344 Another series of control experiments were performed to test the specificity of these genetic  
345 interactions. First, given that both *PDPK1* and *PPP2R5D* affect synaptic growth as homozygous null

346 mutations, we asked whether neuronal morphology was substantially altered in the double heterozygous  
347 mutant combinations of *PDPK1* or *PPP2R5D* with each ASD-associated gene ortholog. This was not the  
348 case. Altered NMJ growth was not commonly observed in the majority of genetic interactions tested  
349 (Figure S4). We do find evidence that the heterozygous *CHD8*/+ mutation predisposes the NMJ to modest  
350 overgrowth, consistent with *CHD8* influencing brain development in other systems (Gompers et al.,  
351 2017). But, there was no synergistic or common effect that correlated with widespread block of PHP.  
352 Thus, we conclude that altered synaptic growth is not the cause of common PHP failure.

353

### 354 **Deletion of *PPP2R5D* impairs the robustness of PHP**

355         Given that *PPP2R5D* and *PDPK1* both genetically interact with multiple ASD-associated gene  
356 mutations, and given that several of the ASD-associated genes sensitize PHP toward failure, we  
357 considered whether *PPP2R5D* and *PDPK1* are also directly involved with the induction of PHP. Unlike  
358 many of the ASD genes, both *PPP2R5D* and *PDPK1* are viable as homozygous deletion mutations,  
359 allowing a direct test of their involvement in PHP. To our surprise, neither *PPP2R5D* nor *PDPK1* can be  
360 classified as strictly essential for the mechanisms of PHP based on analysis of homozygous LOF mutants  
361 (Figure S5). PHP is fully expressed in the homozygous *PDPK1* mutant (Figure S5), demonstrating that  
362 this gene is not required. There is a statistically significant suppression of PHP in the homozygous LOF  
363 mutation in *PPP2R5D* suggesting a role for this gene in the rapid induction of PHP, but without being  
364 strictly necessary (Figure S5).

365         We note that both *PDPK1* and *PPP2R5D* control signaling that directly intersects with the  
366 AKT/mTOR pathway, a signaling system that is associated with ASD in human (Alessi et al., 1997;  
367 Manning and Toker, 2017; Yeung et al., 2017). The mTOR signaling proteins *S6K* and *Tor* have both  
368 been implicated in the long-term maintenance of PHP. However, both are dispensable for the rapid, PhTx-  
369 dependent induction of PHP (Cheng et al., 2011; Penney et al., 2012). Never-the-less, the possible  
370 connection to Tor signaling prompted us to revisit our screen data and ask whether mutations affecting the  
371 broader AKT/mTOR signaling system might also be common ASD-gene modifiers. The genes *Akt*, *S6K*,  
372 *TSC1*, *TSC2*, and *PTP61F* are all encoded on the *Drosophila* third chromosome. All of these genes were  
373 present within the deficiencies that were tested in our screen. But, none were identified as a hit in our  
374 unbiased forward genetic screen. Although the lack of a genetic interaction cannot be used to conclude  
375 the absence of a role for these genes in the PHP effects that we observe, it seems likely that *PPP2R5D*  
376 and *PDPK1* have other targets relevant to the intersection of ASD-gene mutations and the rapid induction  
377 of PHP. Consistent with this possibility, *PDPK1* and *PPP2R5D* are predicted to have opposing actions on  
378 AKT, yet both genes participate in the blockade of PHP when combined with a mutation in one of the  
379 five ASD-associated gene mutations (see discussion). Furthermore, as demonstrated below, one

380 mechanism by which PHP is blocked is novel and unexpected.

381

### 382 **Dissecting the mechanism of impaired PHP in a single double heterozygous mutant combination**

383 It is rare for a genetic study to define, precisely, how a double heterozygous interaction creates a  
384 synthetic phenotype if the two genes do not encode proteins that biochemically interact. Simply put, there  
385 are a vast number of possible mechanisms by which SSNC could occur (Yook et al., 2001). None-the-less,  
386 we attempted to do so for at least one double heterozygous combination. Although this represents only a  
387 single mechanism of SSNC, it could provide proof of principle for how PHP is affected in other ASD  
388 gene interactions. We chose the genetic interaction of *PPP2R5D*/+ with *CHD8*/+. This combination was  
389 chosen because *CHD8* is among the most common ASD *de novo* gene mutations. Furthermore, the  
390 genetic interaction is highly penetrant.

391 We began by pursuing additional phenotypic analyses, looking for clues in a wider variety of  
392 cellular and electrophysiological measures. It is possible that the genetic interaction of *PPP2R5D*/+ with  
393 *CHD8*/+ could indirectly affect PHP expression by altering motoneuron firing properties. Therefore, we  
394 analyzed intrinsic excitability and neuronal firing by patch clamp electrophysiology of larval  
395 motoneurons. There is no change in motoneuron firing frequency in response to a series of step current  
396 pulse injection. Likewise, there are no changes in action potential amplitude, cell input resistance or  
397 rheobase comparing wild type with each single heterozygous mutation and the double heterozygote  
398 (Figure S6). Thus, aberrant excitability is not linked to impaired PHP.

399

### 400 **Ultrastructural correlate of impaired PHP: altered presynaptic membrane trafficking**

401 Next, we turned to electron microscopy to determine whether the genetic interaction of  
402 *PPP2R5D*/+ with *CHD8*/+ affects the presynaptic release site. Ultrastructural changes have previously  
403 been linked to impaired PHP (Harris et al., 2018). Thin section transmission electron microscopy was  
404 used to examine the synapse, defined as a characteristic increase in pre- and postsynaptic membrane  
405 electron density, opposing clustered presynaptic vesicles and a characteristic presynaptic density, termed  
406 a T-bar. We find that the ultrastructure of *CHD8*/+ alone was wild type (Figure 6B, D, E). The  
407 ultrastructure of *PPP2R5D*/+ alone was wild type (Figure 6A, D, E). However, the double heterozygous  
408 mutant showed evidence of large membrane structures surrounding the presynaptic release site and  
409 apparent stalled endocytic events, appearing adjacent to sites of neurotransmitter release where  
410 compensatory synaptic vesicle endocytosis occurs (Figure 6C, insets). Quantification of vesicle size  
411 reveals a large increase in average intracellular vesicle diameter for all vesicles within 150nm of the base  
412 of the presynaptic release site, defined by the T-bar structure (Figure 6D, E), again selective to the double  
413 heterozygous mutant. These data provide a striking visual confirmation of the genetic interaction between

414 *PPP2R5D*/+ and *CHD8*/+. And, this is further evidence linking the action of a chromatin-remodeling  
415 factor (*CHD8*) to the stability of synaptic transmission.

416         Given the appearance of enlarged vesicles at or near the presynaptic release site, we repeated our  
417 ultrastructural analysis of the double heterozygous mutant, fixing the synapse immediately (~1-5 sec)  
418 after strong stimulation of presynaptic release (50Hz stimulation, 10seconds). In wild type, there was no  
419 change in the number or appearance of presynaptic vesicles when fixed immediately following the  
420 stimulus. However, in the double heterozygous mutant condition (*CHD8*/+; *PPP2R5D*/+) we found that  
421 intracellular vesicles were further increased in size and took on a crenulated appearance (Figure 6F-I).  
422 These data are consistent with the enlarged vesicles being endosomal intermediates, arguing that the  
423 process of vesicle recycling is altered in the double heterozygous mutant. In further support of this idea,  
424 we demonstrate enhanced synaptic depression in response to high frequency (50Hz) stimulation (Figure  
425 S7). Regardless of the underlying molecular mechanism leading to this EM phenotype and associated  
426 physiological deficits (a topic for future study), these data present a striking, visual confirmation of a  
427 strong synthetic genetic interaction between *PPP2R5D*/+ and the *CHD8*/+ heterozygous mutations.  
428 Furthermore, these data link the activity of a chromatin remodeling factor, present in the nucleus (*CHD8*),  
429 to a profound synaptic defect. Experiments detailed below, including genetic rescue, confirm the  
430 specificity of this EM phenotype.

431

### 432 **Differential gene expression analyses**

433         One possible reason that genes isolated from our screen are common modifiers of diverse ASD  
434 genes is that each modifier is a direct transcriptional target of the ASD mutants. It is possible to assess  
435 this by RNAseq. To our knowledge, side-by-side differential gene expression analysis has yet to be  
436 performed for multiple heterozygous ASD-associated gene mutant backgrounds. We performed whole  
437 genome RNAseq analysis for wild types and the four heterozygous ASD mutants (four biological  
438 replicates) (Figure 7A). We asked whether any of the genes contained within the 20 deficiencies  
439 identified in the screen (37 genes) are commonly altered in all four of ASD-associated mutants (Figure  
440 7A, orange data points). None were commonly differentially regulated (p-value=0.096 for *ASH1L*/+; p-  
441 value=0.636 for *WDFY3*/+; p-value=0.392 for *CHD2*/+; p-value=0.112 for *CHD8*/+; Wilcoxon sign rank  
442 test two-sided). We conclude that common down-regulation of identified genetic modifiers cannot  
443 account for the common impairment of PHP that we observe electrophysiologically.

444         Next, we asked whether the ASD-associated gene mutations might cause common changes in  
445 gene expression, with potential relevance to a common disruption of PHP. We define all differentially  
446 expressed genes common to at least two ASD mutations (Figure 7B, C). While there are individual genes  
447 that are commonly differentially regulated, a GO database analysis of differentially expressed genes did

448 not reveal any consistent change in a gene category across all four genotypes. The patterns of gene  
449 dysregulation do not predict any pattern of genetic interactions documented in our systems-genetic  
450 analysis. Finally, while there are genes that are commonly dysregulated in multiple ASD gene orthologs,  
451 there are only two genes that are commonly down-regulated in all four ASD mutants (*FBgn0027578*  
452 [*Nep121*] and *FBgn0037166* [*CG11426*]) (Figure 7C). *FBgn0027578* encodes a metalloprotease of the  
453 Neprilysin family, with homology to endothelin converting enzyme 1 in human, of unknown function in  
454 the nervous system. *FBgn0037166* encodes phosphatidic acid phosphatase type 2, which is expressed in  
455 the *Drosophila* nervous system, but of unknown function. There is no obvious means to connect the down  
456 regulation of these two genes to impaired homeostatic signaling, although future experiments will explore  
457 these genes in greater depth. Furthermore, there is no clear connection, biochemically or genetically, to  
458 the role of *PDPK1* or *PPP2R5D* in the nervous system. Thus, a transcriptional analysis of heterozygous  
459 ASD gene mutations alone did not allow us to make clear progress toward understanding the mechanisms  
460 of impaired PHP.

461

#### 462 **Candidate mechanisms for impaired PHP based on differential gene expression analysis**

463 Next, we continued with our focus on characterizing the homeostasis defect in the *CHD8/+*;  
464 *PPPR25D/+* double heterozygous mutant combination. We repeated the RNAseq differential gene  
465 expression analysis comparing the double heterozygous condition to three control conditions, inclusive of  
466 wild type and each single heterozygous mutant alone. In this manner, we sought to identify synergistic  
467 effects on gene expression that could not be accounted for in either single heterozygous mutant alone  
468 (Figure 7D, E). As expected, many of the differentially expressed genes documented in the double  
469 heterozygous mutant, when compared to wild type, could be accounted for by subsequent comparisons to  
470 each single heterozygous mutant. However, a small number of genes (14 genes; 5 upregulated and 9  
471 downregulated) appear to be synergistically differentially expressed in the double heterozygous mutant  
472 compared to all three control conditions (Figure 7D, E). We successfully replicated altered expression of  
473 four genes in the double heterozygous mutant combination by quantitative RT-PCR (Figure 8A, B). Of  
474 these genes, *CREG* stood out as being robustly and dramatically up-regulated. Upon closer inspection,  
475 *CREG* showed a slight, but significant, up-regulation in the *CHD8/+* mutant (Figure 7A), and this was  
476 enhanced by the presence of the heterozygous *PPP2R5D/+* mutation (Figure 7E, left). Next, we  
477 confirmed the up-regulation of *CREG* in the third instar larval central nervous system by QPCR (Figure  
478 S8B). Finally, we took advantage of a previously published gene expression data set (Parish et al., 2015)  
479 and document *CREG* expression in motoneurons throughout embryonic and larval development. *CREG* is  
480 strongly expressed in embryonic motoneurons (20-24h after egg laying – AEL), after which expression  
481 levels plummet (Figure S8A).

482

483 ***CREG* is a homeostatic repressor.**

484 *CREG* (Cellular Repressor of E1A-stimulated Genes) encodes an endosomal/lysosomal localized  
485 glycoprotein that is linked to stress responses in other systems as well as to the homeostatic maintenance  
486 of the vascular epithelium (Ghobrial et al., 2018; Kowalewski-Nimmerfall et al., 2014). Mammalian  
487 orthologs are expressed in the brain (Yang et al., 2011). However, *CREG* function has never been  
488 addressed in the nervous system of any organism. Given that we observe a strong synaptic internal  
489 membrane phenotype in the *CHD8+; PPP2R5D/+* double heterozygous mutant, and given that *CREG*  
490 localizes to the endo-lysosomal system, we chose to study *CREG* in greater detail, asking if it is causally  
491 involved in PHP.

492 Two independent transposon insertion mutations were identified, residing in the *Drosophila*  
493 *CREG* gene locus (Figure 8C). The *CREG<sup>M1</sup>* transposon completely abolishes *CREG* expression and a  
494 heterozygous *CREG<sup>M1</sup>/+* mutant reduces *CREG* expression by 50% (data not shown). Next, we generated  
495 a triple heterozygous mutant combination (*CHD8+; PPP2R5D/+; CREG<sup>M1</sup>/+*) and find that the  
496 *CREG<sup>M1</sup>/+* allele attenuates the up-regulation of *CREG* gene transcript in the triple heterozygous mutant  
497 background, a suppression effect of approximately 50%, as predicted (Figure 8D). Then, we repeated this  
498 analysis with the *CREG<sup>M2</sup>* allele and discovered that this transposon insertion caused a complete block of  
499 *CREG* up-regulation in the triple heterozygous mutant combination, suggesting that this transposon  
500 insertion, residing in 3' UTR, may disrupt a transcription regulatory motif (Figure 8D).

501 Next, we asked whether the triple heterozygous mutant combinations, in which *CREG* up-  
502 regulation is either attenuated or abolished, would rescue the expression of homeostatic plasticity and  
503 synaptic ultrastructure. In both triple mutant combinations (*CHD8+; PPP2R5D/+; CREG<sup>M1</sup>/+*) and  
504 (*CHD8+; PPP2R5D/+; CREG<sup>M2</sup>/+*), the expression of PHP is fully rescued (Figure 8E, F). These data  
505 are consistent with the conclusion that the abnormally enhanced levels of *CREG* transcription are  
506 responsible for the block of homeostatic plasticity seen in the double heterozygous mutant combination. If  
507 true, then we might also see rescue of the ultrastructural phenotype in the *CHD8+; PPP2R5D/+;*  
508 *CREG<sup>M1</sup>/+* triple mutant. Indeed, this is the case (Figure 8G). We observe full rescue of synaptic  
509 ultrastructure. Thus, preventing the dramatic up-regulation of *CREG*, without abolishing *CREG*  
510 expression, is sufficient to restore membrane trafficking and PHP to the presynaptic nerve terminal of the  
511 *CHD8+; PPP2R5D/+* double mutant combination.

512 It is possible that *CREG* is a novel suppressor of PHP. However, it is also possible that *CREG*  
513 mediates this effect only in the context of the other two heterozygous mutations. To address this  
514 possibility, we generated a *UAS-CREG* transgenic line, allowing cell-type specific overexpression of the  
515 *CREG* gene. Over-expression of *CREG* in a wild type background using either a ubiquitously expressed



516 source of GAL4 (*tubulin-GAL4*), or a GAL4-line that is selective to motoneurons (*OK371-GAL4*), causes  
517 a complete block of PHP (Figure 8J-K). As a control for adverse developmental effects of *CREG*  
518 overexpression, we analyzed NMJ anatomy and find no substantive effects on NMJ growth or  
519 morphology that could account for the absence of PHP (Figure S9). Our data are consistent with the  
520 conclusion that *CREG* is a novel homeostatic repressor, one of very few identified to date (Spring et al.,  
521 2016). This finding underscores the complexity of interpreting the double heterozygous mutant  
522 combinations that cause blockade of PHP.

523

#### 524 **Assessing the generality of CREG as a mechanism for impaired PHP.**

525 In mammals, there are two *CREG* genes and *CREG2* is expressed in the brain (Yang et al., 2011).  
526 A recent study provides evidence that *CREG2* expression is enhanced in layer 4 excitatory neurons,  
527 isolated from human postmortem ASD patient brain tissue (Velmeshev et al., 2019), suggesting possible  
528 relevant. This fact prompted us to ask whether over-expression *CREG* is the primary mechanism  
529 responsible for the disruption of PHP, or whether it is just one of many. Our existing gene expression  
530 analysis demonstrates that *CREG* is not up-regulated in the other heterozygous mutations (*ASHIL* or  
531 *CHD2* or *WDFY3*; Figure 7). This was extended to the *PDPK1/+* mutant and, again, *CREG* levels are not  
532 increased. Finally, we analyzed two additional double heterozygous mutant combinations (*PDPK1/+* with  
533 *CHD2/+* as well as *PPP2R5D/+* with *CHD2/+*). *CREG* was not up-regulated compared to single  
534 heterozygous controls. Finally, we repeated the ultrastructural analysis for a second genetic combination  
535 (*PPP2R5D/+* with *CHD2/+*). No phenotype of enlarged vesicles or endomembranes observed (Figure  
536 S10). From these data, we conclude that the aberrant over-expression of *CREG* is not a universal cause of  
537 impaired PHP in the double heterozygous interactions. In the future, a systematic test of all genetic  
538 combinations identified in our screen may define whether *CREG* over-expression is unique to a single  
539 genetic interaction or whether it is reflected in a subset of gene interactions.

540

#### 541 **Discussion**

542 In this study, we make several fundamental advances. First, we provide evidence that mutations  
543 in multiple different ASD-associated genes sensitize homeostatic plasticity to fail (Figure 9A, B). Second,  
544 using genome-scale forward genetics and subsequent systems-genetic analyses, we identify the first  
545 phenotypic modifiers that commonly enhance five different ASD-associated gene mutations, causing a  
546 specific failure of PHP (Figure 9A). Third, we identify *PDPK1* and *PPP2R5D* as common phenotypic  
547 modifiers of multiple ASD-associated genes and, thereby, define a mechanistic link between synaptic  
548 transmission, PHP and chromatin remodeling complexes in the neuronal nucleus (Figure 9A). Finally, we  
549 define how PHP fails at the intersection of an ASD-associated gene mutation and phenotypic modifier.



550 The mechanism is unexpected, involving the maladaptive up-regulation of a novel repressor of  
551 homeostatic plasticity (*CREG*) (Figure 9C). We demonstrate that up-regulation of *CREG* cannot explain  
552 other gene-gene interactions, undercoring the potential complexity of gene-gene interactions and the  
553 common failure of PHP. Regardless of potential mechanistic complexity, our data argue that impaired  
554 PHP may be a common pathophysiological effect downstream of LOF mutations in five different ASD-  
555 associated genes. If our data can be extended to additional ASD genes, and to other experimental systems  
556 including human neurons, then it may be possible to use this information to advance therapeutic  
557 approaches that modify ASD phenotypic severity regardless of the underlying genetic mutation(s) that  
558 confer risk for ASD.

559 The loss or impairment of PHP could contribute to the phenotypic penetrance of an ASD gene  
560 mutation in multiple ways. Impaired PHP is expected to render the nervous system less robust to  
561 perturbation including the effects of environment stress, immunological stress, or genetic mutation (Davis,  
562 2013, 2006). If an ASD-associated gene mutation leads to neural developmental defects, then loss of PHP  
563 would be expected to exacerbate the functional consequences. According to the same logic, loss of PHP  
564 might enhance the adverse effects of environmental or immunological stress, both of which are thought to  
565 contribute to ASD pathophysiology (Beverdors et al., 2018; Modabbernia et al., 2017). Finally, loss of  
566 PHP could be relevant to the appearance or severity of ASD comorbidities, including epilepsy.

567 It should be emphasized that failed homeostatic plasticity cannot be determined by simply  
568 assessing the phenotype of a heterozygous ASD-associated gene mutation. The observation of a  
569 phenotype, such as altered E/I balance or impaired neurotransmission, could reflect failure of homeostatic  
570 plasticity, or it could reflect the outcome of successful homeostatic mechanisms that constrained a  
571 phenotype that might otherwise have been more severe (Davis, 2013; Kulik et al., 2019). Ultimately, the  
572 loss or impairment of homeostatic plasticity can only be determined by a direct test of homeostatic  
573 robustness; specifically referring the ability of a neuron, synapse or neural circuit to respond to a  
574 perturbation and sustain normal function in the continued presence of the perturbation (Davis, 2013,  
575 2006). Thus, our data set the stage for similar analyses in other model organisms, potentially extending  
576 the connection between ASD-associated gene mutations and the robustness of PHP or other forms of  
577 homeostatic plasticity.

578

### 579 **The specificity of gene-gene interactions that cause PHP to fail**

580 The genetic interactions that we document in our study appear to be highly specific. First, our  
581 genetic screen was based on the use of deficiency chromosomes that uncover 5-50 genes each, rendering  
582 those genes heterozygous. Thus, each deficiency can be considered to test pairwise gene-gene interactions  
583 among all the genes contained in the deficiency. According to this logic, we tested in excess of 50,000

584 double heterozygous gene combinations and discovered only 20 interactions that cause PHP to fail.  
585 Although it is unlikely that genes are completely randomly distributed throughout the genome, this  
586 calculation still has merit and emphasizes the rarity of gene-gene interactions that cause PHP to fail. In  
587 addition, we found no correlation between the number of genes deleted in a heterozygous deficiency and  
588 the impairment of PHP. Thus, the likelihood of a genetic interaction does not increase with the number of  
589 genes that are rendered heterozygous. Finally, it should be emphasized that PHP is a robust physiological  
590 process that is not unusually susceptible to the effects of genetic mutations. Previously, forward genetic  
591 have observed low rates of gene discovery. Two such screens tested transgenic RNAi against nearly every  
592 kinase and phosphatase encoded in the *Drosophila* genome, a gene set that includes prominent signaling  
593 proteins, the majority of which had no effect on PHP induction or expression (Brusich et al., 2015;  
594 Hauswirth et al., 2018). With this information as a background, the identification of genes that commonly  
595 enhance multiple ASD genes, causing PHP to fail, seems extraordinarily.

596

### 597 **The rapid induction versus long-term expression of PHP**

598 There are two well-established methods to induce expression of PHP. Application of PhTx  
599 induces PHP within minutes, a process that can be maintained for hours (Frank et al., 2006). In addition,  
600 a mutation in the non-essential *GluRIIA* subunit of postsynaptic glutamate receptors drives persistent  
601 expression of PHP. Since the *GluRIIA* mutation is present throughout the life of the organism, it is  
602 inferred that this reflects the long-term maintenance of PHP. Although this distinction reflects only the  
603 duration of the perturbation (acute versus genetic), recent work does argue that the acute induction of  
604 PHP may transition to another long-term expression mechanism (Harris et al., 2018, 2015). Indeed,  
605 screens based on the acute versus long-term PHP have identified different candidate genes, even when  
606 screening a common transgenic RNAi collection (Brusich et al., 2015; Hauswirth et al., 2018).

607 It remains unknown whether one form of PHP is more relevant regarding the intersection of  
608 homeostatic plasticity with diseases or disorders of the nervous system. In the present study, the acute  
609 induction of PHP can be considered a type of ‘stress test’. If the rapid induction of PHP fails, we can infer  
610 that the neurons are less robust to perturbation. In the future, it will be interesting to systematically  
611 determine whether the gene-gene interactions identified here also uniformly perturb PHP induced by the  
612 *GluRIIA* mutation. However, such an analysis is beyond the scope of the present study.

613

### 614 **Common phenotypic enhancers of multiple ASD gene orthologs**

615 How can the existence of common phenotypic modifiers be explained? We began our study with  
616 the demonstration that heterozygous LOF mutations in four unrelated genes ASD-associated gene  
617 including *RIMS1* (presynaptic scaffolding protein), *CHD8* (chromatin helicase), *CHD2* (chromatin

618 helicase) and *ASHIL* (transcriptional activator and histone methyltransferase), all sensitize the expression  
619 of PHP to fail (Figure 1, Figure S2, Figure 9B). One possibility, therefore, is that PHP is commonly  
620 sensitized to fail by heterozygous LOF mutations in each of the five ASD gene orthologs that we chose to  
621 study. If so, then a phenotypic modifier that interacts with one of these genes might also be expected to  
622 commonly interact with the other ASD genes. In other words, commonality arises because of the  
623 unexpected finding that each ASD gene ortholog has an activity that, when diminished, impairs the  
624 robustness of PHP. Our data generally support this model, given that three of four ASD genes interact  
625 with *RIMS1* to block PHP. According to this model, we provide the first evidence that sensitization of  
626 PHP is a common pathophysiological effect downstream of multiple ASD genes with, as yet, unrelated  
627 biological activities.

628         The finding that ASD gene mutations sensitize PHP to fail does not require that each ASD gene  
629 participate in the actual mechanisms of PHP. *RIMS1* is a core component that is required for PHP (Müller  
630 et al., 2012). However, a gene such as *CHD8* might compromise PHP indirectly by causing some form of  
631 cellular stress that interacts with the mechanisms of PHP (Figure 8 J, K). Indeed, it was previously  
632 demonstrated that simultaneous induction of two different forms of homeostatic plasticity creates  
633 interference and homeostatic failure (Bergquist et al., 2010). The same argument can apply to the novel  
634 class of common phenotypic modifiers. Some modifiers may represent core components of PHP,  
635 including *PPP2R5D*, which seems to suppress PHP when knocked out (Figure S5). However, the *PDPK1*  
636 knockout has no effect on PHP and, therefore, may interact with the mechanisms of PHP indirectly. Thus,  
637 we cannot rule out the possibility that compounded cellular stressors occasionally intersect and cause PHP  
638 to fail.

639

#### 640 **Novel mechanisms impair PHP; CREG-dependent suppression of PHP.**

641         We explored, in detail, how PHP fails at the intersection of *CHD8/+* and *PPP2R5D/+*. First, we  
642 discovered a profound effect on synaptic ultrastructure that was not observed in either single  
643 heterozygous mutation. This provided dramatic visual proof of a strong, genetic interaction between these  
644 two heterozygous gene mutations. Next, we demonstrate that this strong, genetic interaction is not a  
645 consequence of extensive transcriptional dysregulation. Indeed, when the effects of each heterozygous  
646 gene mutation are taken into account, only 14 genes show evidence of altered transcription. A single gene,  
647 *CREG*, was subsequently demonstrated to be the cause of impaired PHP and disrupted presynaptic  
648 membrane trafficking. Although *CREG2* is not upregulated in the heterozygous *CHD8/+* mouse, a recent  
649 study provides evidence that *CREG2* expression is enhanced in layer 4 excitatory neurons, isolated from  
650 human postmortem ASD patient brain tissue (Gompers et al., 2017; Velmeshev et al., 2019).

651         It remains to be determined how loss of *PPP2R5D* causes further dysregulation of *CREG* in the

652 background of *CHD8*/. One possibility is that *CREG* is a stress-response gene, and up-regulation occurs  
653 at the intersection of two cellular stresses. Other alternatives remain plausible, including a direct  
654 connection between *CHD8* and *CREG* that is modulated by PPP2R5D-mediated signaling. The  
655 biochemical and transcriptional relationships will be defined in subsequent work and are beyond the  
656 scope of our current study. The generality of this genetic interaction will also be explored. We note, for  
657 example, that *CREG* shows a mild increase only in the *CHD8*/+ mutant, not in the other three ASD-  
658 associated genes (Figure 7A). This does not rule out *CREG* participating in genetic interactions involving  
659 other ASD-associated genes, but it might suggest additional mechanisms will be engaged.

660 *CREG* encodes a glycoprotein that localizes within the endo-lysosomal system and may also be  
661 secreted. In mammals, there are two *CREG* genes and *CREG2* is expressed in the brain (Yang et al.,  
662 2011). There is generally more information regarding the function of *CREG1*, which is an effector of  
663 tissue homeostasis in the vascular epithelium (Ghobrial et al., 2018). In this capacity, *CREG* seems to  
664 function as a stress response factor, influencing the activity of several potent signaling systems (Ghobrial  
665 et al., 2018). Our current phenotypic analyses suggest that increased levels of *CREG* may directly impact  
666 the integrity of synaptic vesicle membrane recycling and, either directly or indirectly, interface with the  
667 homeostatic potentiation of vesicle release. Thus, while a full dissection of *CREG* activity remains for  
668 future studies, our data argue that *CREG* has an activity that could be directly coupled to vesicle release  
669 and recycling, an ideal situation to normally limit the homeostatic potentiation of vesicle fusion.

670

## 671 **Relevance and Conclusions**

672 It is well established that genetic context can profoundly influence the phenotypic severity of  
673 disease-causing gene mutations. For example, in mice, it has been shown that genetic context (strain  
674 background) influences phenotypic penetrance in an Alzheimer's disease model (Neuner et al., 2019). In  
675 humans, systematic screening of the phenotypically normal population has identified individuals that are  
676 resistant to the effects of well-established, debilitating disease causing mutations, an effect termed  
677 'resilience' that is attributed to the effects of genetic context (Chen et al., 2016; Friend and Schadt, 2014).  
678 It seems plausible that the common phenotypic enhancers, identified in our genetic screen, could  
679 represent a mechanism by which genetic context influences the phenotypic penetrance of ASD-associated  
680 gene mutations. We recognize that *PDPK1* and *PPP2R5D* have fewer than expected LOF and missense  
681 mutations in humans (<http://exac.broadinstitute.org>). It remains to be determined if this will be the case  
682 with additional modifier genes. Furthermore, we note that PHP is completely blocked at the intersection  
683 of ASD gene mutations and the common modifiers we identify. Therefore, subtle changes in the  
684 expression or function of common phenotypic modifiers, perhaps caused by mutations in  
685 enhancer/promoter regions, could impact expression or robustness of PHP with cascading negative

686 phenotypic consequences. If our findings can be extended to other systems, including humans, it is  
687 conceivable that our emerging mechanistic understanding could be used to restore the beneficial effects of  
688 homeostatic plasticity and alleviate aspects of ASD phenotype, irrespective of individual genetic makeup.

689

690

## 691 **References**

- 692 Alessi DR, James SR, Downes CP, Holmes AB, Gaffney PRJ, Reese CB, Cohen P. 1997.  
693 Characterization of a 3-phosphoinositide-dependent protein kinase which phosphorylates and  
694 activates protein kinase Ba. *Curr Biol* **7**:261–269. doi:10.1016/S0960-9822(06)00122-9
- 695 Antoine MW, Langberg T, Schnepel P, Feldman DE. 2019. Increased Excitation-Inhibition Ratio  
696 Stabilizes Synapse and Circuit Excitability in Four Autism Mouse Models. *Neuron* **101**:648-661.e4.  
697 doi:10.1016/J.NEURON.2018.12.026
- 698 Ashworth A, Lord CJ, Reis-Filho JS. 2011. Genetic interactions in cancer progression and treatment. *Cell*  
699 **145**:30–8. doi:10.1016/j.cell.2011.03.020
- 700 Bergquist S, Dickman DK, Davis GW. 2010. A hierarchy of cell intrinsic and target-derived homeostatic  
701 signaling. *Neuron* **66**:220–34. doi:10.1016/j.neuron.2010.03.023
- 702 Bernal M, Zhurinsky J, Iglesias-Romero AB, Sanchez-Romero MA, Flor-Parra I, Tomas-Gallardo L,  
703 Perez-Pulido AJ, Jimenez J, Daga RR. 2014. Proteome-wide search for PP2A substrates in fission  
704 yeast. *Proteomics* **14**:1367–1380. doi:10.1002/pmic.201300136
- 705 Beversdorf DQ, Stevens HE, Jones KL. 2018. Prenatal Stress, Maternal Immune Dysregulation, and Their  
706 Association With Autism Spectrum Disorders. *Curr Psychiatry Rep* **20**:76. doi:10.1007/s11920-018-  
707 0945-4
- 708 Bourgeron T. 2015. From the genetic architecture to synaptic plasticity in autism spectrum disorder. *Nat*  
709 *Publ Gr* **16**. doi:10.1038/nrn3992
- 710 Brusich DJ, Spring AM, Frank CA. 2015. A single-cross, RNA interference-based genetic tool for  
711 examining the long-term maintenance of homeostatic plasticity. *Front Cell Neurosci* **9**:107.  
712 doi:10.3389/fncel.2015.00107
- 713 Chan DA, Giaccia AJ. 2011. Harnessing synthetic lethal interactions in anticancer drug discovery. *Nat*  
714 *Rev Drug Discov* **10**:351–64. doi:10.1038/nrd3374
- 715 Chen R, Shi L, Hakenberg J, Naughton B, Sklar P, Zhang J, Zhou H, Tian L, Prakash O, Lemire M,  
716 Sleiman P, Cheng W, Chen W, Shah H, Shen Y, Fromer M, Omberg L, Deardorff MA, Zackai E,  
717 Bobe JR, Levin E, Hudson TJ, Groop L, Wang J, Hakonarson H, Wojcicki A, Diaz GA, Edelman L,  
718 Schadt EE, Friend SH. 2016. Analysis of 589,306 genomes identifies individuals resilient to severe  
719 Mendelian childhood diseases. *Nat Biotechnol* **34**:531–538. doi:10.1038/nbt.3514

- 720 Cheng L, Locke C, Davis GW. 2011. S6 kinase localizes to the presynaptic active zone and functions  
721 with PDK1 to control synapse development. *J Cell Biol* **194**:921–35. doi:10.1083/jcb.201101042
- 722 Davis GW. 2013. Homeostatic signaling and the stabilization of neural function. *Neuron* **80**:718–28.  
723 doi:10.1016/j.neuron.2013.09.044
- 724 Davis GW. 2006. Homeostatic control of neural activity: from phenomenology to molecular design. *Annu*  
725 *Rev Neurosci* **29**:307–323. doi:10.1146/annurev.neuro.28.061604.135751
- 726 De Rubeis S, He X, Goldberg AP, Poultney CS, Samocha K, Ercument Cicek A, Kou Y, Liu L, Fromer  
727 M, Walker S, Singh T, Klei L, Kosmicki J, Fu S-C, Aleksic B, Biscaldi M, Bolton PF, Brownfeld  
728 JM, Cai J, Campbell NG, Carracedo A, Chahrour MH, Chiochetti AG, Coon H, Crawford EL,  
729 Crooks L, Curran SR, Dawson G, Duketis E, Fernandez BA, Gallagher L, Geller E, Guter SJ, Sean  
730 Hill R, Ionita-Laza I, Jimenez Gonzalez P, Kilpinen H, Klauck SM, Kolevzon A, Lee I, Lei J,  
731 Lehtimäki T, Lin C-F, Ma'ayan A, Marshall CR, McInnes AL, Neale B, Owen MJ, Ozaki N,  
732 Parellada M, Parr JR, Purcell S, Puura K, Rajagopalan D, Rehnström K, Reichenberg A, Sabo A,  
733 Sachse M, Sanders SJ, Schafer C, Schulte-Rüther M, Skuse D, Stevens C, Szatmari P, Tammimies  
734 K, Valladares O, Voran A, Wang L-S, Weiss LA, Jeremy Willsey A, Yu TW, Yuen RKC, Cook EH,  
735 Freitag CM, Gill M, Hultman CM, Lehner T, Palotie A, Schellenberg GD, Sklar P, State MW,  
736 Sutcliffe JS, Walsh CA, Scherer SW, Zwick ME, Barrett JC, Cutler DJ, Roeder K, Devlin B, Daly  
737 MJ, Buxbaum JD, Roeder K, Devlin B, Daly MJ, Buxbaum JD. 2014. Synaptic, transcriptional and  
738 chromatin genes disrupted in autism. *Nature* **515**:209–215. doi:10.1038/nature13772
- 739 Deeg KE, Aizenman CD. 2011. Sensory modality-specific homeostatic plasticity in the developing optic  
740 tectum. *Nat Neurosci* **14**:548–50. doi:10.1038/nn.2772
- 741 Eaton BA, Fetter RD, Davis GW. 2002. Dynactin is necessary for synapse stabilization. *Neuron* **34**:729–  
742 741. doi:10.1016/S0896-6273(02)00721-3
- 743 Frank CA, Kennedy MJ, Goold CP, Marek KW, Davis GW. 2006. Mechanisms underlying the rapid  
744 induction and sustained expression of synaptic homeostasis. *Neuron* **52**:663–77.  
745 doi:10.1016/j.neuron.2006.09.029
- 746 Frank CA, Pielage J, Davis GW. 2009. A Presynaptic Homeostatic Signaling System Composed of the  
747 Eph Receptor, Ephexin, Cdc42, and CaV2.1 Calcium Channels. *Neuron* **61**:556–569.  
748 doi:10.1016/j.neuron.2008.12.028
- 749 Friend SH, Schadt EE. 2014. Clues from the resilient. *Science (80- )* **344**:970–972.  
750 doi:10.1126/science.1255648
- 751 Gaugler T, Klei L, Sanders SJ, Bodea CA, Goldberg AP, Lee AB, Mahajan M, Manaa D, Pawitan Y,  
752 Reichert J, Ripke S, Sandin S, Sklar P, Svantesson O, Reichenberg A, Hultman CM, Devlin B,  
753 Roeder K, Buxbaum JD. 2014. Most genetic risk for autism resides with common variation. *Nat*



- 754 *Genet* **46**:881–885. doi:10.1038/ng.3039
- 755 Genç Ö, Dickman DK, Ma W, Tong A, Fetter RD, Davis GW. 2017. MCTP is an ER-resident calcium  
756 sensor that stabilizes synaptic transmission and homeostatic plasticity. *Elife* **6**:e22904.  
757 doi:10.7554/eLife.22904
- 758 Ghobrial G, Araujo L, Jinwala F, Li S, Lee LY. 2018. The Structure and Biological Function of CREG.  
759 *Front Cell Dev Biol* **6**:136. doi:10.3389/fcell.2018.00136
- 760 Gibson G. 2009. Decanalization and the origin of complex disease. *Nat Rev Genet* **10**:134–140.  
761 doi:10.1038/nrg2502
- 762 Gompers AL, Su-Feher L, Ellegood J, Copping NA, Riyadh MA, Stradleigh TW, Pride MC, Schaffler  
763 MD, Wade AA, Catta-Preta R, Zdilar I, Louis S, Kaushik G, Mannion BJ, Plajzer-Frick I, Afzal V,  
764 Visel A, Pennacchio LA, Dickel DE, Lerch JP, Crawley JN, Zarbalis KS, Silverman JL, Nord AS.  
765 2017. Germline Chd8 haploinsufficiency alters brain development in mouse. *Nat Neurosci* **20**:1062–  
766 1073. doi:10.1038/nn.4592
- 767 Harris N, Braiser DJ, Dickman DK, Fetter RD, Tong A, Davis GW. 2015. The Innate Immune Receptor  
768 PGRP-LC Controls Presynaptic Homeostatic Plasticity. *Neuron* **88**:1157–64.  
769 doi:10.1016/j.neuron.2015.10.049
- 770 Harris N, Fetter RD, Brasier DJ, Tong A, Davis GW. 2018. Molecular Interface of Neuronal Innate  
771 Immunity, Synaptic Vesicle Stabilization, and Presynaptic Homeostatic Plasticity. *Neuron*  
772 **100**:1163-1179.e4. doi:10.1016/j.neuron.2018.09.048
- 773 Hartman JL, Garvik B, Hartwell L. 2001. Principles for the buffering of genetic variation. *Science*  
774 **291**:1001–4.
- 775 Hauswirth AG, Ford KJ, Wang T, Fetter RD, Tong A, Davis GW. 2018. A postsynaptic PI3K-cII  
776 dependent signaling controller for presynaptic homeostatic plasticity. *Elife* **7**:e31535.  
777 doi:10.7554/eLife.31535
- 778 Hengen KB, Lambo ME, Van Hooser SD, Katz DB, Turrigiano GG. 2013. Firing Rate Homeostasis in  
779 Visual Cortex of Freely Behaving Rodents. *Neuron* **80**:335–342. doi:10.1016/j.neuron.2013.08.038
- 780 Henry FE, McCartney AJ, Neely R, Perez AS, Carruthers CJL, Stuenkel EL, Inoki K, Sutton MA. 2012.  
781 Retrograde Changes in Presynaptic Function Driven by Dendritic mTORC1. *J Neurosci* **32**:17128–  
782 17142. doi:10.1523/JNEUROSCI.2149-12.2012
- 783 Hou J, Tan G, Fink GR, Andrews BJ, Boone C. 2019. Complex modifier landscape underlying genetic  
784 background effects. *Proc Natl Acad Sci U S A* **116**:5045–5054. doi:10.1073/pnas.1820915116
- 785 Iossifov I, O’Roak BJ, Sanders SJ, Ronemus M, Krumm N, Levy D, Stessman HA, Witherspoon KT,  
786 Vives L, Patterson KE, Smith JD, Paepfer B, Nickerson DA, Dea J, Dong S, Gonzalez LE, Mandell  
787 JD, Mane SM, Murtha MT, Sullivan CA, Walker MF, Waqar Z, Wei L, Willsey AJ, Yamrom B,



- 788 Lee Y, Grabowska E, Dalkic E, Wang Z, Marks S, Andrews P, Leotta A, Kendall J, Hakker I,  
789 Rosenbaum J, Ma B, Rodgers L, Troge J, Narzisi G, Yoon S, Schatz MC, Ye K, McCombie WR,  
790 Shendure J, Eichler EE, State MW, Wigler M. 2014. The contribution of de novo coding mutations  
791 to autism spectrum disorder. *Nature* **515**:216–221. doi:10.1038/nature13908
- 792 Jakawich SK, Nasser HB, Strong MJ, McCartney AJ, Perez AS, Rakesh N, Carruthers CJL, Sutton MA.  
793 2010. Local Presynaptic Activity Gates Homeostatic Changes in Presynaptic Function Driven by  
794 Dendritic BDNF Synthesis. *Neuron* **68**:1143–1158. doi:10.1016/j.neuron.2010.11.034
- 795 Kim SH, Ryan TA. 2010. CDK5 serves as a major control point in neurotransmitter release. *Neuron*  
796 **67**:797–809. doi:10.1016/j.neuron.2010.08.003
- 797 Kitano H. 2007. Towards a theory of biological robustness. *Mol Syst Biol* **3**. doi:10.1038/msb4100179
- 798 Kowalewski-Nimmerfall E, Schähs P, Maresch D, Rendic D, Krämer H, Mach L. 2014. Drosophila  
799 melanogaster cellular repressor of E1A-stimulated genes is a lysosomal protein essential for fly  
800 development. *Biochim Biophys Acta - Mol Cell Res* **1843**:2900–2912.
- 801 Kulik Y, Jones R, Moughamian AJ, Whippen J, Davis GW. 2019. Dual separable feedback systems  
802 govern firing rate homeostasis. *Elife* **8**. doi:10.7554/eLife.45717
- 803 Liu G, Tsien RW. 1995. Properties of synaptic transmission at single hippocampal synaptic boutons.  
804 *Nature* **375**:404–8. doi:10.1038/375404a0
- 805 Loveday C, Tatton-Brown K, Clarke M, Westwood I, Renwick A, Ramsay E, Nemeth A, Campbell J,  
806 Joss S, Gardner M, Zachariou A, Elliott A, Ruark E, van Montfort R, Rahman N, Rahman N. 2015.  
807 Mutations in the PP2A regulatory subunit B family genes *PPP2R5B*, *PPP2R5C* and *PPP2R5D*  
808 cause human overgrowth. *Hum Mol Genet* **24**:4775–4779. doi:10.1093/hmg/ddv182
- 809 Maffei A, Fontanini A. 2009. Network homeostasis: a matter of coordination. *Curr Opin Neurobiol*  
810 **19**:168–173. doi:10.1016/j.conb.2009.05.012
- 811 Mair B, Moffat J, Boone C, Andrews BJ. 2019. Genetic interaction networks in cancer cells. *Curr Opin*  
812 *Genet Dev* **54**:64–72. doi:10.1016/j.gde.2019.03.002
- 813 Manning BD, Toker A. 2017. Leading Edge Review AKT/PKB Signaling: Navigating the Network.  
814 doi:10.1016/j.cell.2017.04.001
- 815 Marder E. 2011. Variability, compensation, and modulation in neurons and circuits. *Proc Natl Acad Sci U*  
816 *SA* **108**:15542–8. doi:10.1073/pnas.1010674108
- 817 Marder E, Goaillard J-M. 2006. Variability, compensation and homeostasis in neuron and network  
818 function. *Nat Rev Neurosci* **7**:563–574. doi:10.1038/nrn1949
- 819 Modabbernia A, Velthorst E, Reichenberg A. 2017. Environmental risk factors for autism: an evidence-  
820 based review of systematic reviews and meta-analyses. *Mol Autism* **8**:13. doi:10.1186/s13229-017-  
821 0121-4

- 822 Müller M, Davis GW. 2012. Transsynaptic Control of Presynaptic Ca<sup>2+</sup> Influx Achieves Homeostatic  
823 Potentiation of Neurotransmitter Release. *Curr Biol*. doi:10.1016/j.cub.2012.04.018
- 824 Müller M, Genç Ö, Davis GW. 2015. RIM-Binding Protein Links Synaptic Homeostasis to the  
825 Stabilization and Replenishment of High Release Probability Vesicles. *Neuron* **85**:1056–1069.  
826 doi:10.1016/j.neuron.2015.01.024
- 827 Müller M, Liu KSY, Sigrist SJ, Davis GW. 2012. RIM controls homeostatic plasticity through  
828 modulation of the readily-releasable vesicle pool. *J Neurosci* **32**:16574–85.  
829 doi:10.1523/JNEUROSCI.0981-12.2012
- 830 Mullins C, Fishell G, Tsien RW. 2016. Unifying Views of Autism Spectrum Disorders: A Consideration  
831 of Autoregulatory Feedback Loops. *Neuron*. doi:10.1016/j.neuron.2016.02.017
- 832 Nelson SB, Valakh V. 2015. Excitatory/Inhibitory Balance and Circuit Homeostasis in Autism Spectrum  
833 Disorders. *Neuron* **87**:684–698. doi:10.1016/j.neuron.2015.07.033
- 834 Neuner SM, Heuer SE, Huentelman MJ, O’Connell KMS, Kaczorowski CC. 2019. Harnessing Genetic  
835 Complexity to Enhance Translatability of Alzheimer’s Disease Mouse Models: A Path toward  
836 Precision Medicine. *Neuron* **101**:399-411.e5. doi:10.1016/j.neuron.2018.11.040
- 837 O’Neil NJ, Bailey ML, Hieter P. 2017. Synthetic lethality and cancer. *Nat Rev Genet* **18**:613–623.  
838 doi:10.1038/nrg.2017.47
- 839 Ortega JM, Genç Ö, Davis GW. 2018. Molecular mechanisms that stabilize short term synaptic plasticity  
840 during presynaptic homeostatic plasticity. *Elife* **7**. doi:10.7554/eLife.40385
- 841 Parrish JZ, Kim CC, Tang L, Bergquist S, Wang T, DeRisi JL, Jan LY, Jan YN, Davis GW. 2014.  
842 Krüppel Mediates the Selective Rebalancing of Ion Channel Expression. *Neuron* **82**:537–544.  
843 doi:10.1016/j.neuron.2014.03.015
- 844 Penney J, Tsurudome K, Liao EH, Elazzouzi F, Livingstone M, Gonzalez M, Sonenberg N, Haghghi AP.  
845 2012. TOR Is Required for the Retrograde Regulation of Synaptic Homeostasis at the Drosophila  
846 Neuromuscular Junction. *Neuron* **74**:166–178. doi:10.1016/j.neuron.2012.01.030
- 847 Plomp JJ, van Kempen GT, Molenaar PC. 1992. Adaptation of quantal content to decreased postsynaptic  
848 sensitivity at single endplates in alpha-bungarotoxin-treated rats. *J Physiol* **458**:487–499.
- 849 Ramocki MB, Zoghbi HY. 2008. Failure of neuronal homeostasis results in common neuropsychiatric  
850 phenotypes. *Nature* **455**:912–918. doi:10.1038/nature07457
- 851 Sackton TB, Hartl DL. 2016. Genotypic Context and Epistasis in Individuals and Populations. *Cell*.  
852 doi:10.1016/j.cell.2016.06.047
- 853 Sanders SJ, He X, Willsey AJ, Ercan-Sencicek AG, Samocha KE, Cicek AE, Murtha MT, Bal VH,  
854 Bishop SL, Dong S, Goldberg AP, Jinlu C, Keaney JF, Klei L, Mandell JD, Moreno-De-Luca D,  
855 Poultney CS, Robinson EB, Smith L, Solli-Nowlan T, Su MY, Teran NA, Walker MF, Werling DM,

- 856 Beaudet AL, Cantor RM, Fombonne E, Geschwind DH, Grice DE, Lord C, Lowe JK, Mane SM,  
857 Martin DM, Morrow EM, Talkowski ME, Sutcliffe JS, Walsh CA, Yu TW, Ledbetter DH, Martin  
858 CL, Cook EH, Buxbaum JD, Daly MJ, Devlin B, Roeder K, State MW, State MW. 2015. Insights  
859 into Autism Spectrum Disorder Genomic Architecture and Biology from 71 Risk Loci. *Neuron*  
860 **87**:1215–1233. doi:10.1016/j.neuron.2015.09.016
- 861 Sardi M, Gasch AP. 2018. Genetic background effects in quantitative genetics: gene-by-system  
862 interactions. *Curr Genet* **64**:1173–1176. doi:10.1007/s00294-018-0835-7
- 863 Shang L, Henderson LB, Cho MT, Petrey DS, Fong C-T, Haude KM, Shur N, Lundberg J, Hauser N,  
864 Carmichael J, Innis J, Schuette J, Wu YW, Asaikar S, Pearson M, Folk L, Retterer K, Monaghan  
865 KG, Chung WK. 2016. De novo missense variants in PPP2R5D are associated with intellectual  
866 disability, macrocephaly, hypotonia, and autism. *Neurogenetics* **17**:43–49. doi:10.1007/s10048-015-  
867 0466-9
- 868 Simons Simplex Collection – SFARI. n.d.
- 869 Spring AM, Brusich DJ, Frank CA. 2016. C-terminal Src Kinase Gates Homeostatic Synaptic Plasticity  
870 and Regulates Fasciclin II Expression at the Drosophila Neuromuscular Junction. *PLoS Genet* **12**.  
871 doi:10.1371/journal.pgen.1005886
- 872 Turrigiano G. 2011. Too many cooks? Intrinsic and synaptic homeostatic mechanisms in cortical circuit  
873 refinement. *Annu Rev Neurosci* **34**:89–103. doi:10.1146/annurev-neuro-060909-153238
- 874 Velmeshev D, Schirmer L, Jung D, Haeussler M, Perez Y, Mayer S, Bhaduri A, Goyal N, Rowitch DH,  
875 Kriegstein AR. 2019. Single-cell genomics identifies cell type-specific molecular changes in autism.  
876 *Science* **364**:685–689. doi:10.1126/science.aav8130
- 877 Viquez NM, Fügler P, Valakh V, Daniels RW, Rasse TM, DiAntonio A. 2009. PP2A and GSK-3beta act  
878 antagonistically to regulate active zone development. *J Neurosci* **29**:11484–94.  
879 doi:10.1523/JNEUROSCI.5584-08.2009
- 880 Viquez NM, Li CR, Wairkar YP, DiAntonio A. 2006. The B' Protein Phosphatase 2A Regulatory Subunit  
881 well-rounded Regulates Synaptic Growth and Cytoskeletal Stability at the Drosophila  
882 Neuromuscular Junction. *J Neurosci* **26**:9293–9303. doi:10.1523/JNEUROSCI.1740-06.2006
- 883 Watt AJ, Desai NS. 2010. Homeostatic Plasticity and STDP: Keeping a Neuron's Cool in a Fluctuating  
884 World. *Front Synaptic Neurosci* **2**:5. doi:10.3389/fnsyn.2010.00005
- 885 Yang G, Han Y, Tian X, Tao J, Sun M, Kang J, Yan C. 2011. Pattern of expression of the CREG gene  
886 and CREG protein in the mouse embryo. *Mol Biol Rep* **38**:2133–2140. doi:10.1007/s11033-010-  
887 0340-7
- 888 Yeung KS, Tso WWY, Ip JJK, Mak CCY, Leung GKC, Tsang MHY, Ying D, Pei SLC, Lee SL, Yang W,  
889 Chung BH-Y. 2017. Identification of mutations in the PI3K-AKT-mTOR signalling pathway in

890 patients with macrocephaly and developmental delay and/or autism. *Mol Autism* **8**:66.  
891 doi:10.1186/s13229-017-0182-4  
892 Yook KJ, Proulx SR, Jorgensen EM. 2001. Rules of Nonallelic Noncomplementation at the Synapse in  
893 <em><em>Caenorhabditis elegans</em></em>; *Genetics* **158**:209 LP – 220.  
894 Zhao C, Dreosti E, Lagnado L. 2011. Homeostatic synaptic plasticity through changes in presynaptic  
895 calcium influx. *J Neurosci* **31**:7492–7496. doi:10.1523/JNEUROSCI.6636-10.2011

896

### 897 **Acknowledgements**

898 Supported by NINDS Grant (R35-NS097212) and Simons Foundation (SFARI #401636) to GWD and  
899 Simons Foundation (SFARI #402281) and NIMH (R01 MH110928) to SJS. We thank Matt State for  
900 comments and support and members of the Davis, State and Sanders labs for critical evaluation of the  
901 manuscript.

902

### 903 **Supplemental Information**

904 **Figures S1-S10**

905 **Tables S1-S3**

906

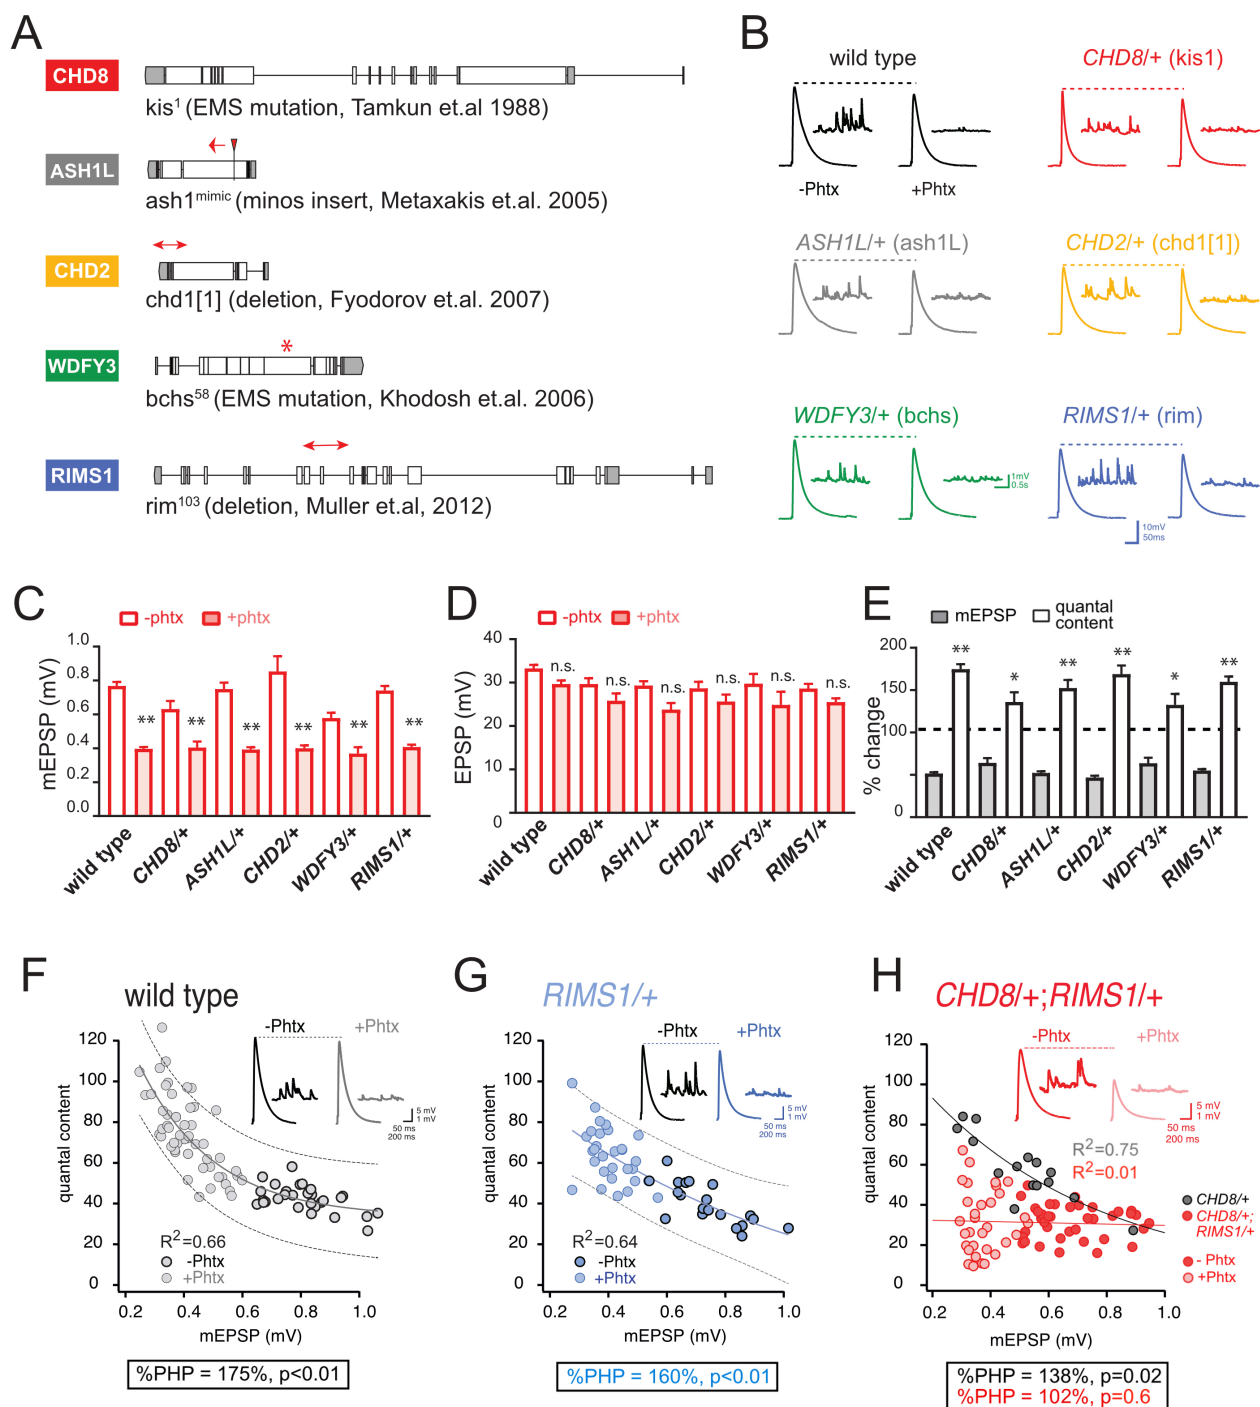

9  
908  
909  
910  
911  
912  
913  
914  
915

**Figure 1: Heterozygous ASD gene mutations do not affect baseline transmission or PHP**

**A**, Schematic of the *Drosophila* locus for *CHD8*, *ASH1L*, *CHD2*, *WDFY3* and *RIMS1* with gene disruptions indicated. **B**, Representative EPSP and mEPSP traces for indicated genotypes (+/-PhTx for each genotype, left traces and right traces respectively) **C-D**, Quantification of mEPSP amplitude (**C**) and EPSP amplitude (**D**) in the absence and presence of PhTx (open and filled bars respectively). **E** The percent change of mEPSP and quantal content as indicated, comparing the presence and absence of PhTx for each genotype with Student's t-test (two tail), \*  $p < 0.05$ , \*\*  $p < 0.01$ . Sample sizes for data reported (C-

916 E) are as follows (n reported for each genotype +/- PhTx): *wild type*: n=36/47; *CHD8*+/+: n=7/8;  
917 *ASH1L*+/+: n=15/25; *WDFY3*+/+: n=8/7; *CHD2*+/+: n=8/19; *RIMS1*+/+: n=20/30. **F-H**, Scatter plots of  
918 quantal content (*y* axis) versus mEPSP amplitude (*x* axis) for wild type (left), *RIMS1*+/+ mutant (middle)  
919 and the *CHD8*+/+; *RIMS1*+/+ double heterozygous mutant. Each symbol represents an individual muscle  
920 recording. Inset: representative traces (+/- PhTx). Exponential data fit (black line, R<sup>2</sup>-value inset,  
921 calculated based on a linear fit). Dashed lines encompass 95% of all data (absent in **(H)** for clarity).  
922 Below each graph (F-H), boxes display percent PHP (+/- PhTx for each genotype), statistical values  
923 compared to baseline (H).  
924

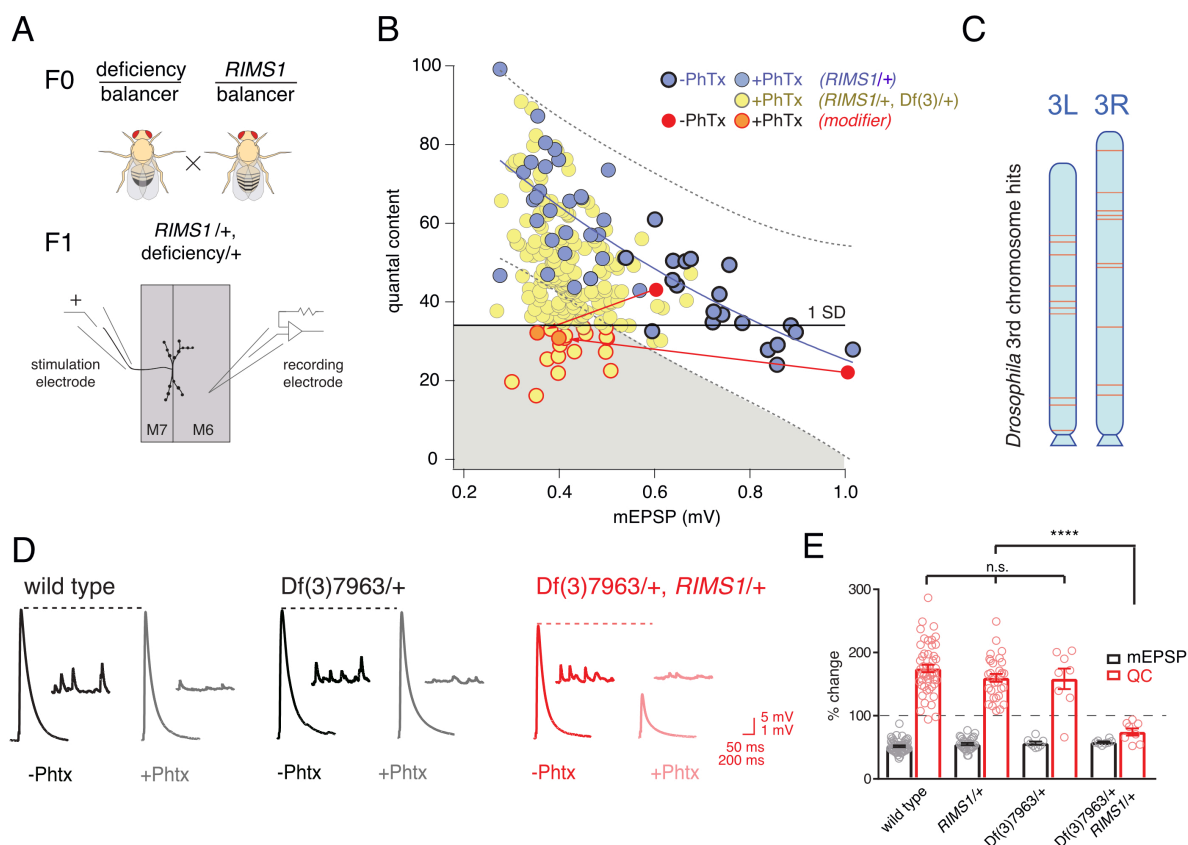

925  
926  
927  
928  
929  
930  
931  
932  
933  
934  
935  
936  
937  
938

**Figure 2: Screen for common genomic modifiers of ASD-associated gene mutations.**

**A**, Diagram of genetic screen. **B**, Screen results are shown with yellow circles representing average data per genotype. Fit (solid blue line) and confidence interval (dotted lines encompassing 95% of all data) from *RIMS1*<sup>+/+</sup> are overlaid. Black horizontal line defines one standard deviation from population mean (yellow circles). Gray area encompasses potential hits residing outside the *RIMS1*<sup>+/+</sup> confidence interval and below the solid line. Two modifiers are shown in the absence (dark red circles) and presence of PhTx (light red circles, dark outline) **C**, Approximate location of hits (red lines) on chromosome 3. **D**, Representative traces for indicated genotypes in the presence and absence of PhTx as indicated. **E**, Average percent change in mEPSP amplitude (gray bars) and quantal content (red bars) in presence of PhTx compared to baseline. One-way ANOVA and posthoc Tukey's multiple comparisons; \*\*\*\* p<0.0001 for quantal content (QC).



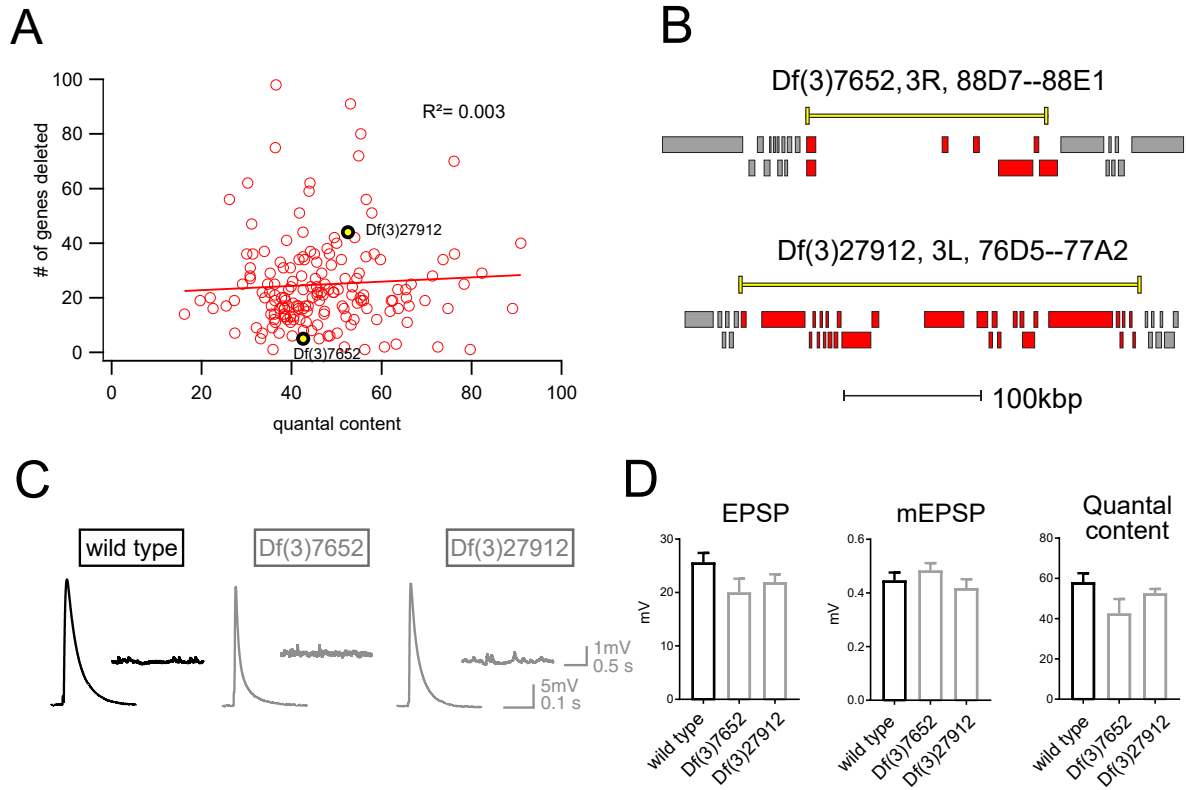

939  
940  
941  
942  
943  
944  
945  
946  
947  
948  
949  
950

**Figure 3: Absence of an additive effect of gene heterozygosity on synaptic transmission or PHP**

**A**, Scatter plot showing the number of genes deleted (y axis) versus quantal content (x axis) in the presence of PhTx for all deficiencies tested. Each circle represents average data from an individual muscle recording for an individual deficiency. Red line shows the fit with a Pearson coefficient of 0.003.

**B**, Schematic of two deficiency alleles showing the extent of the deletion (yellow bars) and the genes deleted (red boxes)

**C**, Representative EPSP and mEPSP traces for indicated genotypes

**D**, Quantification of EPSP, mEPSP amplitude and quantal content for the indicated genotypes. All deficiencies recorded as heterozygous mutations in the presence of *RIMS1*/+

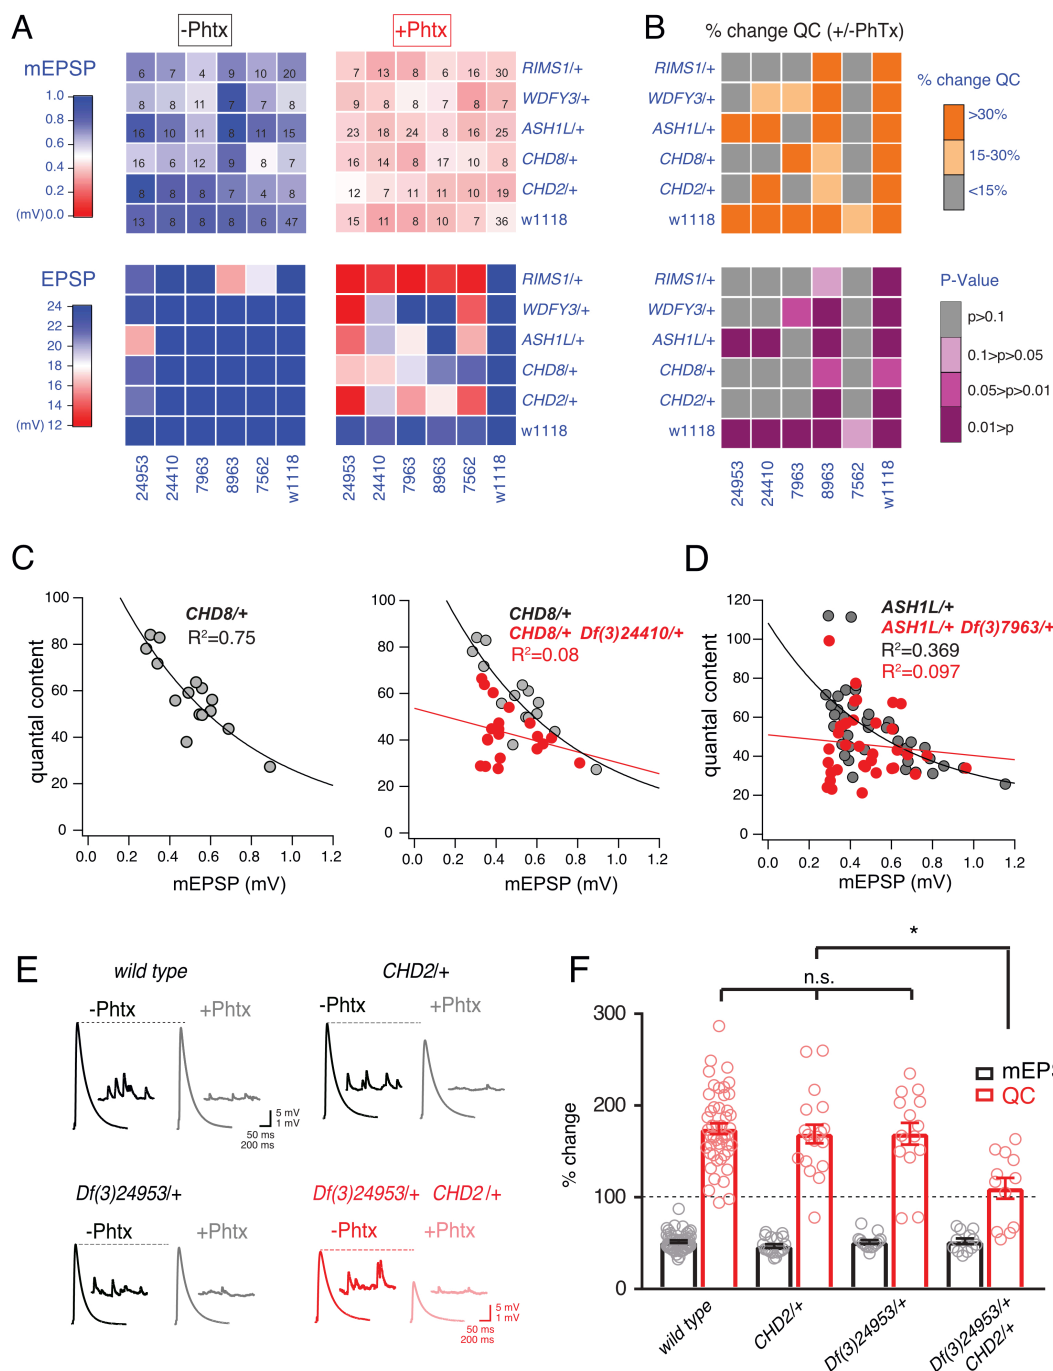

951  
952  
953  
954  
955  
956  
957  
958  
959  
960

**Figure 4: Identification of common modifiers of diverse ASD-associated mutations.**

**A**, Genetic interaction matrix showing average mEPSP (top two matrix) and EPSP (bottom two matrix) amplitudes in the absence (left) and presence (right) of PhTx, as indicated. Values are according to lookup codes at left. Each individual box represents average data for a double-heterozygous mutant at intersection of x and y axes. Sample size (number of NMJ recordings) is displayed for each box (top) and are identical below (bottom). **B**, Top matrix (orange and gray) is organized as in (a). Average percent change in quantal content (+ PhTx) compared to baseline (- PhTx), values according to lookup code. Bottom panel, shows data from top panel re-plotted diagramming p-values for the observed percent change in quantal content (+/-PhTx), values according to lookup code. Student's t-test (two tail)

961 comparing each genotype +/- PhTx. **C**, Scatter plots of quantal content (*y* axis) versus mEPSP amplitude  
962 (*x* axis) for *CHD8*/+ (left), and *CHD8*/+;*Df(3)24410*/+. **D** Scatter plot as in (c) for *ASH1L*/+ and  
963 *ASH1L*/+, *Df(3)7963*/+. Each dot represents average data from an individual muscle recording. Fits as  
964 indicated.  $R^2$  values as indicated (calculated based on linear fit). **E**, Representative traces for indicated  
965 genotypes (+/-PhTx) **F**, Percent change in mEPSP (gray bars) and quantal content (red bars) in presence  
966 of PhTx compared to baseline. One-way ANOVA and posthoc Tukey's multiple comparisons ; \*  $p < 0.05$ .  
967

968

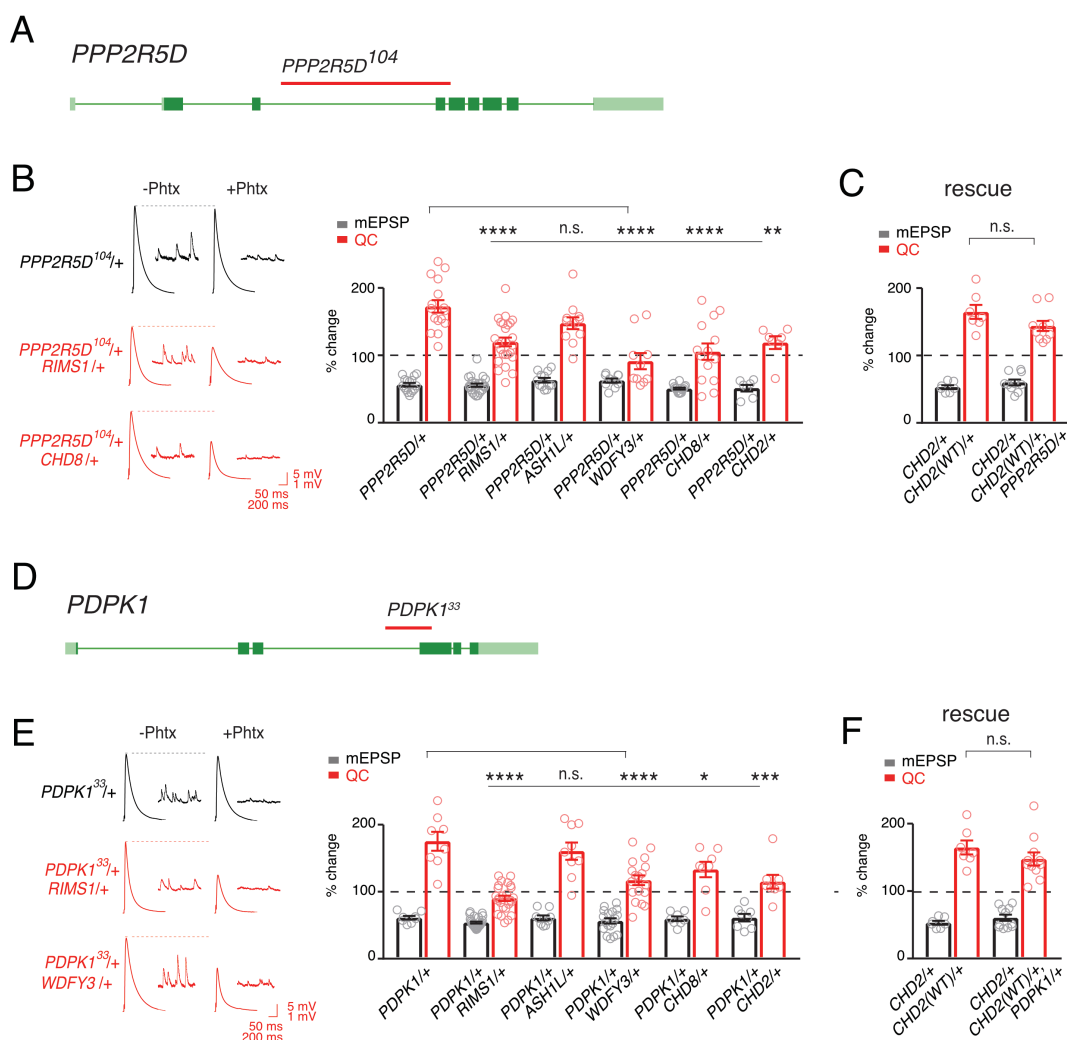

969

970

971 **Figure 5: Single genes are common modifiers of diverse ASD-associated mutations.**

972 **A**, Schematic of the *PPP2R5D* gene locus and the *PPP2R5D<sup>104</sup>* deletion mutation (red horizontal bar). **B**,

973 Representative traces for indicated genotypes. Bar graph (right) shows percent change in mEPSP (gray)

974 and quantal content (red) (+/- PhTx). **C**, Data as in **B** for rescue of the double heterozygous *CHD2<sup>+/+</sup>* and

975 *PPP2R5D<sup>104</sup>/+* mutant by incorporation of a *CHD2* translocation (*CHD2<sup>WT</sup>/+*). **D**, Schematic of the

976 *PDPK1* gene locus with the *PDPK1<sup>33</sup>* deletion mutation (red horizontal bar). **E**, Representative traces for

977 indicated genotypes. Bar graph (right) as in **B**. **F**, Data as in **C** for the genomic rescue of double

978 heterozygous *CHD2<sup>+/+</sup>* and *PDPK1<sup>33</sup>/+* mutants. One-way ANOVA, Dunnett's multiple comparisons \*

979  $p < 0.05$ , \*\*  $p < 0.01$ , \*\*\*  $p < 0.001$ , \*\*\*\*  $p < 0.0001$  for **B** and **E**, Student's t-test, two-tailed for **C** and **F**, n.s.

980  $p > 0.05$ ).

981

982

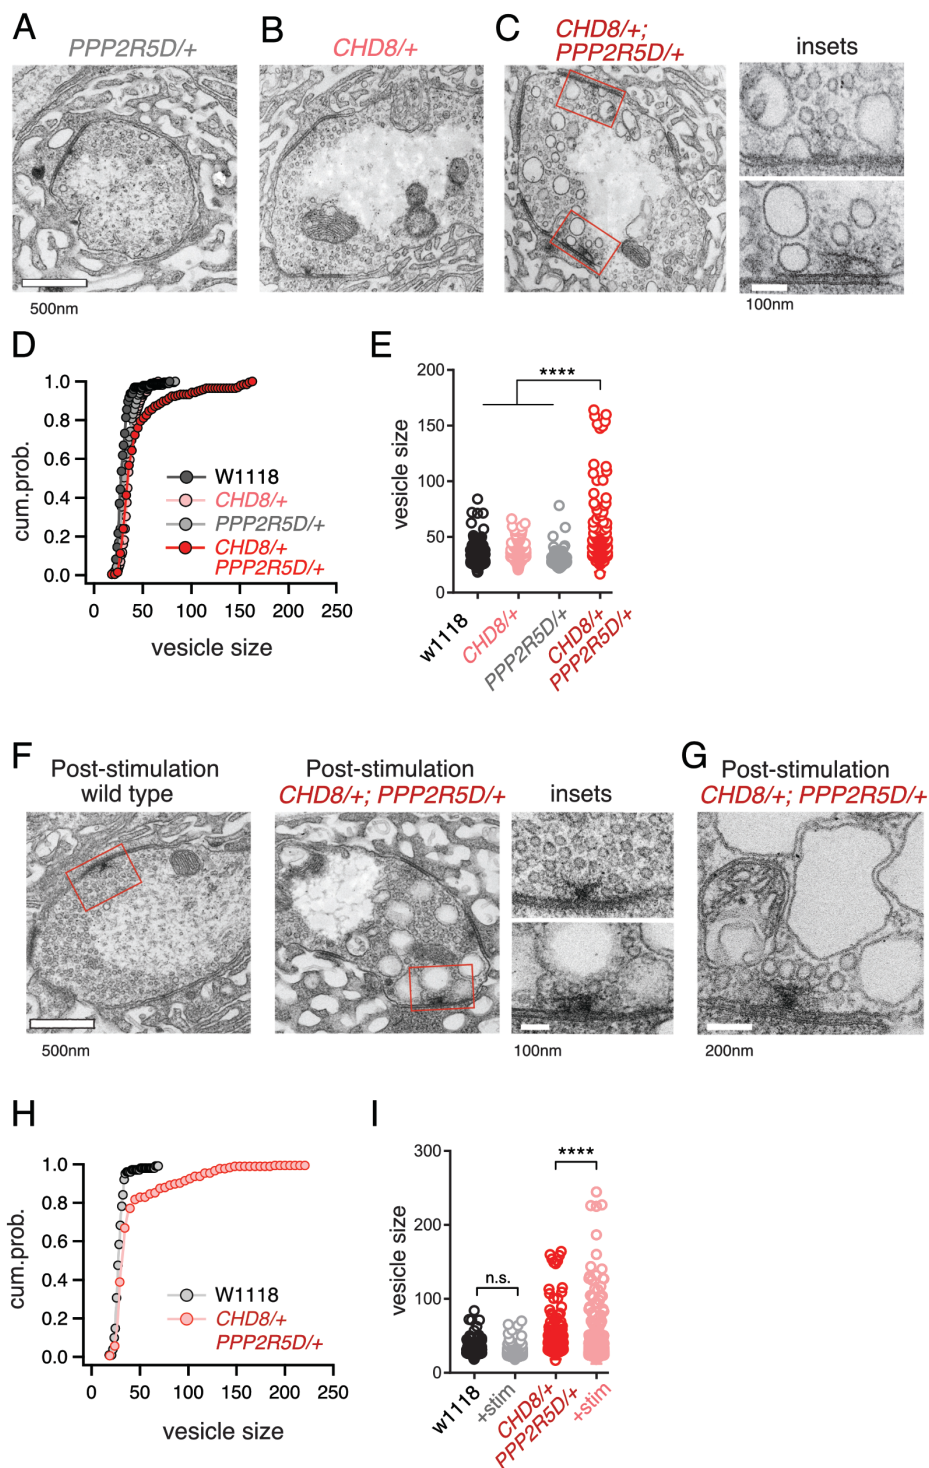

983  
984  
985  
986  
987  
988  
989

**Figure 6: ASD gene-modifier interaction causes impaired synaptic membrane organization**

**A-C**, Representative electron microscopy images of individual boutons inclusive of **(A)** *PPP2R5D/+*, **(B)** *CHD8/+* and **(C)** *CHD8/+; PPP2R5D/+* double heterozygous mutant. Insets **(C)** show individual active zones taken from the image on the left (red rectangles) **D**, Cumulative probability distribution of the vesicle size for wild type (*w1118*) and *CHD8/+* and *PPP2R5D/+* single mutants, as well as the *CHD8/+; PPP2R5D/+* double heterozygous mutants. Each point reflects the average at a single active zone. **E**, Plot

990 of individual data points for each genotype as shown in **(D)**. **F**, Representative electron microscopy  
991 images for individual boutons for indicated genotypes after stimulation with 50 Hz for 10 seconds and  
992 rapid fixation. Insets show active zones for *wild type* (top) and the *CHD8/+; PPP2R5D/+* double  
993 heterozygous mutant (bottom) taken from the images on the left (red rectangles) **G**, An example image  
994 from the *CHD8/+; PPP2R5D+* double heterozygous mutant with larger vesicles having a crenulated  
995 appearance after stimulation **H**, Cumulative probability distribution of the vesicle size for wild type  
996 (*w1118*) and the double heterozygous mutant *CHD8/+; PPP2R5D/+* after stimulation and rapid fixation.  
997 Each point reflects the average at a single active zone. **I**, Plot of individual data points for data in (H).  
998 One-way ANOVA Tukey's multiple comparisons, \*\*\*\*  $p < 0.001$ , n.s.  $p > 0.05$ .  
999  
1000



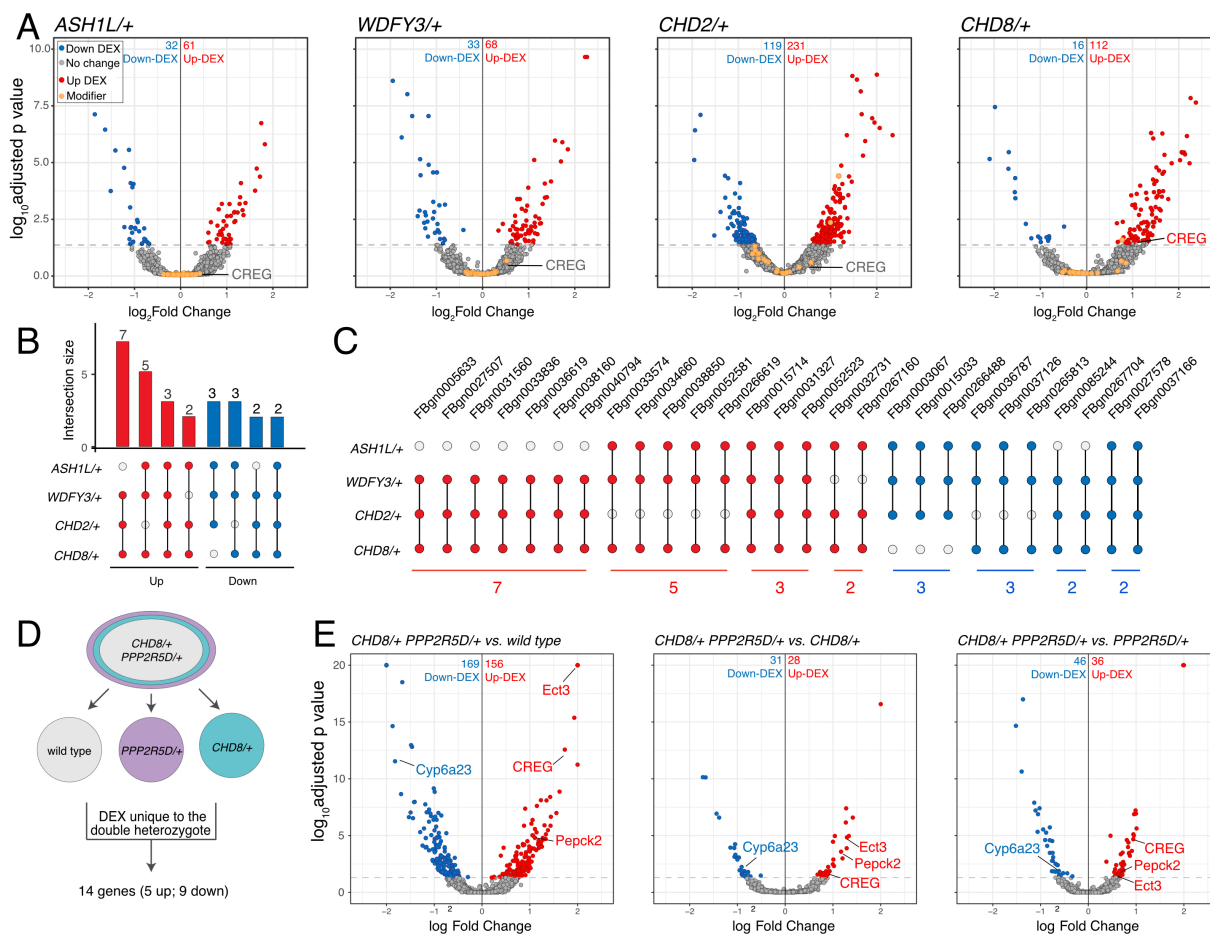

**Figure 7: Differential gene expression analysis identifies *CREG*.**

**A**, Volcano plot display of differentially expressed genes (DEX) for each heterozygous mutant versus wild type. Candidate ASD-gene modifiers are indicated (orange dots). Horizontal dashed line indicates cutoff of adjusted p-values (0.05). **B**, Matrix shows all intersections of DEXs from the four indicated genotypes (see Database S1). Filled circles in the matrix indicate sets that are part of the intersection between genotypes. Bar graphs on the top show the total number of DEXs for each set, ordered by the size of intersection. (blue, up-regulated; red, down-regulated). **C**, Individual genes are listed at the intersection of each genotypes. **D**, Schematic showing the selection of 14 genes uniquely dysregulated in *CHD8*<sup>+/+</sup>; *PPP2R5D*<sup>+/+</sup> double heterozygous mutants. **E**, Volcano plot display of DEX calculated as *CHD8*<sup>+/+</sup>; *PPP2R5D*<sup>+/+</sup> versus wild-type, *CHD8*<sup>+/+</sup>; *PPP2R5D*<sup>+/+</sup> versus *CHD8*<sup>+/+</sup> and *CHD8*<sup>+/+</sup>; *PPP2R5D*<sup>+/+</sup> double heterozygotes versus *PPP2R5D*<sup>+/+</sup> alone.

1001  
1002  
1003  
1004  
1005  
1006  
1007  
1008  
1009  
1010  
1011  
1012  
1013  
1014  
1015

1016

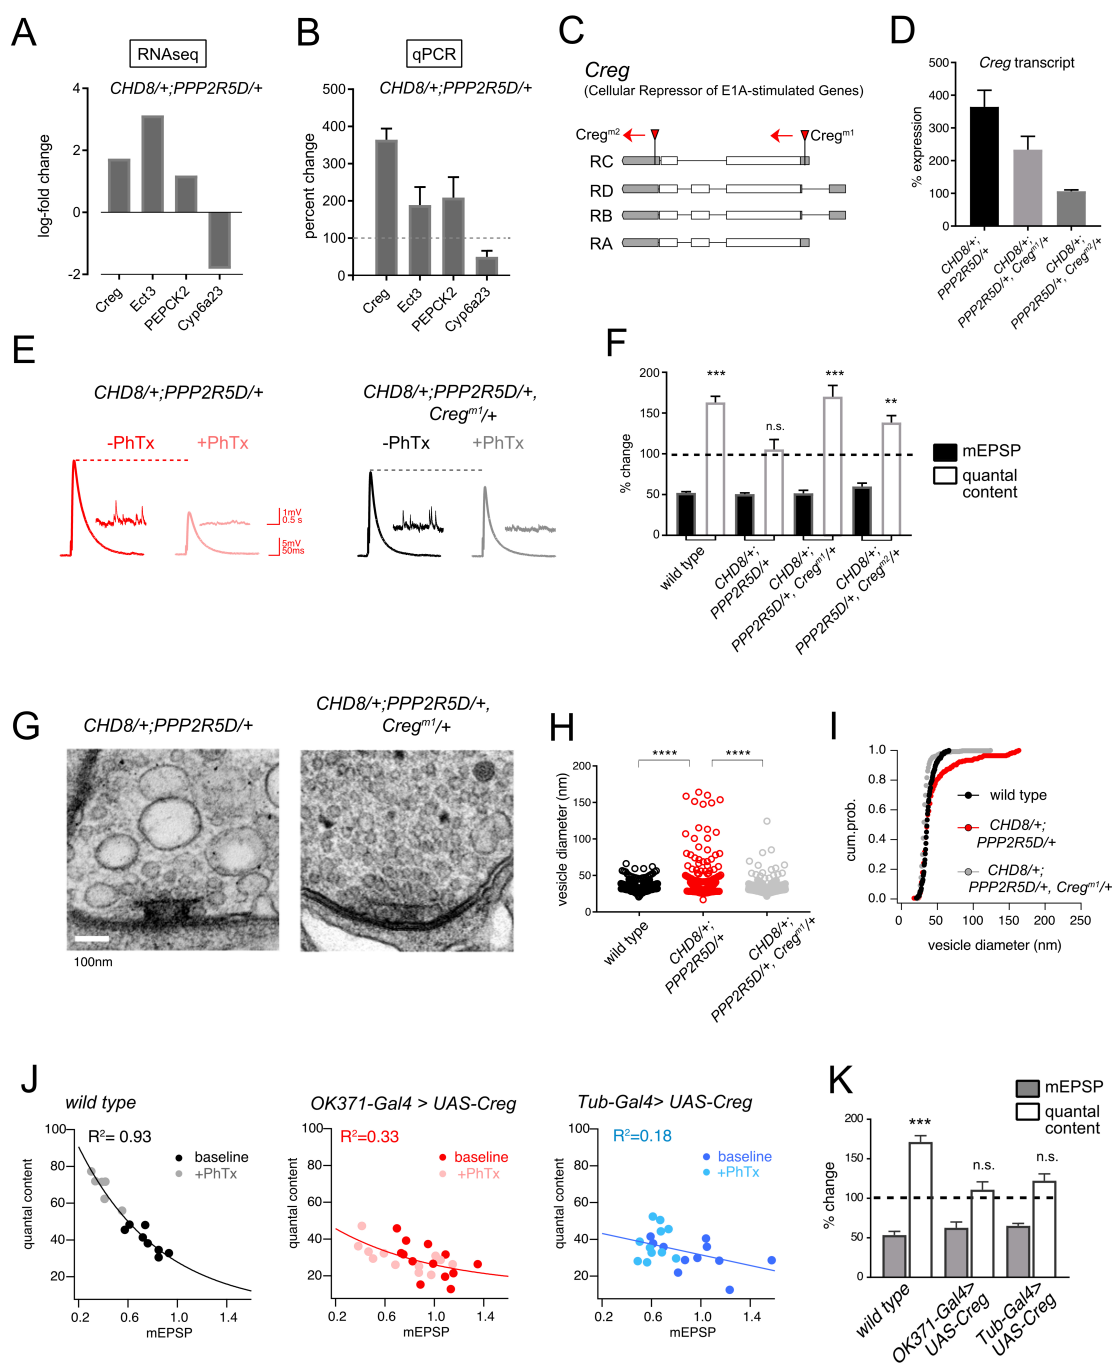

1017

1018

1019

1020

1021

1022

1023

1024

1025

**Figure 8: CREG is a homeostatic repressor that blocks PHP and regulates synapse ultrastructure.**

**A**, Quantification of transcriptional changes calculated by RNAseq for four genes (*CREG*, *Ect3*, *PEPCK2* and *Cyp6a23*) in *CHD8/+; PPP2R5D/+* double heterozygous mutant versus wild-type. **B**, Quantification of the transcriptional changes for the same genes in **(B)** by qPCR. **C**, Schematic of the *Drosophila* *CREG* locus. The positions of two transposon insertion mutations are shown (red triangles). **D**, Average *CREG* transcript levels calculated by qPCR are shown for the indicated genotypes **E**, Representative EPSP and mEPSP traces for indicated genotypes. **F**, Bar graph (right) shows percent change in mEPSP (black filled)

1026 and quantal content (no fill) (+/- PhTx). **G**, Representative electron microscopy images of individual  
1027 active zones from indicated genotypes (double heterozygous mutant at left, triple heterozygous mutant at  
1028 right). Scale bar:100nm. **H**, Individual data points shown for indicated genotypes. **I**, Cumulative  
1029 probability distribution of the vesicle size for the genotypes shown in (H). **J**, Scatter plots of quantal  
1030 content (*y* axis) versus mEPSP amplitude (*x* axis) for *wild type* (left), *OK371-Gal4>UAS-Creg* (middle,  
1031 red) and *Tub-Gal4>UAS-Creg* (right, blue). Fits as indicated.  $R^2$  values as indicated (calculated based on  
1032 linear fit). **K**, Percent change in mEPSP (gray bars) and quantal content (red bars) in presence of PhTx  
1033 compared to baseline. n.s.  $p>0.05$ , \*\*  $p<0.01$ , \*\*\*  $p<0.001$ , \*\*\*\*  $p<0.0001$ .  
1034

1035

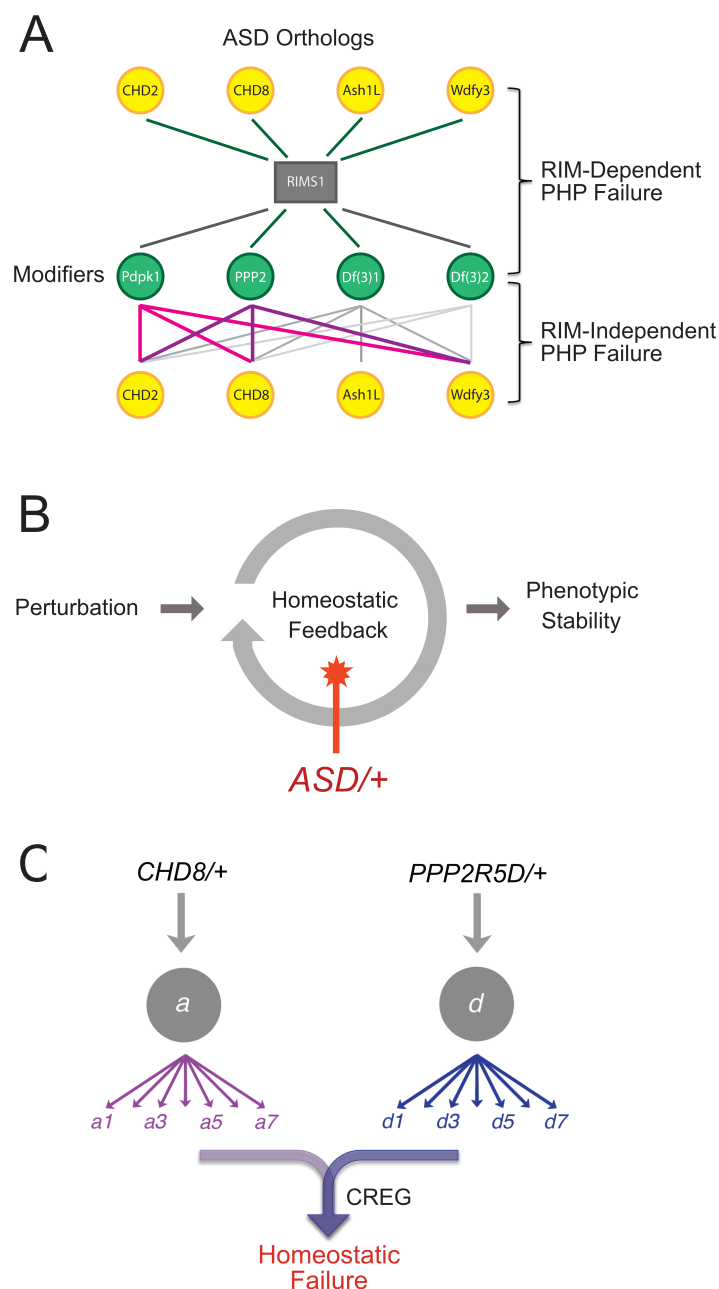

1036

1037

**Figure 9: Summary and Model**

1038

1039

1040

1041

1042

1043

1044

1045

1046

**A**, Summary of genetic interactions. *RIMS1* interacts with three of four ASD gene orthologues, impairing PHP. *RIMS1* interactions identified in a genetic screen as modifiers are shown below in green. Each modifier interacts with multiple ASD heterozygous mutations in a RIM independent manner, disrupting PHP. The data present a complex network of gene-gene interactions (yellow and green) that diminish the robustness of PHP. **B**, Homeostatic signaling systems robustly ensure stable neural function. However, the homeostatic signaling system itself is sensitive to genetic perturbation. We demonstrate that PHP is sensitive to mutations in multiple genes that were identified as ASD risk factors. In at least one instance, this is due to the up-regulation of a PHP interfering factor (*CREG*) and the red star indicates this a possible mechanisms more generally. **C**, Complexity of interpreting double heterozygous gene-gene

1047 interactions. Signaling systems are not blocked by heterozygous gene mutations, but are likely to be  
1048 attenuated to some degree. The combined effect of two higher-order heterozygous gene mutations creates  
1049 a downstream, intersectional effect that is very difficult to predict. In the case of this paper, we succeeded  
1050 in identifying a novel intersection causing up-regulation of *CREG*, which disrupts the homeostatic  
1051 signaling system.  
1052  
1053

1054 **Methods**

1055 **Fly Stocks**

1056 All *Drosophila* stocks were kept and raised on standard food at 25 °C. *RIMS1* was previously  
1057 described (Sigrist, 2012). *PPP2R5D* was a gift from Dr. Aaron Diantonio. *Chd2[1]* and *Chd2[1],Chd2<sup>wt</sup>*  
1058 flies were gifts from Dr. Alexandra Lusser and Dr. Dmitry Fyodorov. All other *Drosophila* stocks were  
1059 obtained from the Bloomington Drosophila Stock Center unless otherwise noted. *W1118* is used as wild-  
1060 type controls. 3<sup>rd</sup> chromosome deficiency fly stocks are balanced over *TM6b* and all stock are on the  
1061 *W1118* background.

1062

1063 **Molecular biology:**

1064 *Drosophila* CREG cDNA was obtained by amplifying the single open reading frame from genomic  
1065 DNA by PCR and cloning directly in to the pENTR vector (Gateway Technology; Invitrogen). We  
1066 engineered a CACC site in the forward primer for the subsequent Gateway reaction: forward primer for  
1067 pUAS<sup>t</sup>-creg: 5' CACCATGGATTCGGACAGCACC 3'; reverse primer for pUAS<sup>t</sup>-creg with a stop  
1068 codon, 5' TCA ATT CGA AAC AGC GTA ATA 3'. The final construct were sequenced to ensure there  
1069 were no mutations. The creg cDNA was then cloned into proper destination vector obtained from the  
1070 *Drosophila* Gateway Vector Collection (Carnegie Institution, DGRC barcode #1129). Transgenic lines  
1071 were generated and mapped using standard methods.

1072

1073 **Electrophysiology**

1074 All current clamp recordings were performed from muscle six, at the second and third segment of  
1075 the third-instar *Drosophila* with an Axoclamp 900 amplifier (Molecular Devices). The composition of the  
1076 extracellular solution (HL3) is (in mM) 70 NaCl, 5 KCl, 10 MgCl<sub>2</sub>, 10 NaHCO<sub>3</sub>, 115 sucrose, 4.2  
1077 trehalose, 5 HEPES. Ca<sup>2+</sup> concentration in the extracellular solution is 0.35 mM unless otherwise noted.  
1078 Homeostatic plasticity was induced by incubating the larvae with Philantotoxin-433 (PhTx, 15–20 μM,  
1079 Sigma) for 10 min as previously described (Frank et al., 2006; Genç et al., 2017). Quantal content  
1080 calculation is made by dividing average EPSP to mEPSP. mEPSPs were analyzed with MiniAnalysis  
1081 program (Synaptosoft). All other physiology data were analyzed with custom written functions in Igor 6  
1082 (Wavemetrics Inc). Data collected from a minimum of two animals from two independent crosses.

1083

1084 **Immunohistochemistry**

1085 Third-instar larvae were dissected, fixed in Bouin's fixative or 4% PFA in PBS, and immunostained  
1086 with previously described methods (Eaton et al., 2002; Harris et al., 2015). Third instar larvae were  
1087 dissected with cold HL3 and immediately fixed with PFA (4%) and incubated overnight at 4 C with



1088 primary antibodies (rabbit anti-Dlg, 1:1000; anti-Brp 1:100, Life Technologies). Alexa-conjugated  
1089 secondary antibodies were used for secondary staining (Jackson Laboratories 1:500). An inverted  
1090 epifluorescence deconvolution confocal microscope (Axiovert 200, Zeiss) equipped with a 100X  
1091 objective (N.A. 1.4), cooled CCD camera (CoolSnap HQ, Roper Scientific) was used to acquire images.  
1092 All acquisition, deconvolution and analysis were done by Slidebook 5.0 software (3I, Intelligent  
1093 Imaging). Structured illumination microscopy (Nikon LSM 710 equipped with 63X objective and Andor  
1094 Ixon EMCCD camera) was used to perform Brp puncta and Dlg labeling experiments. Bouton numbers  
1095 were quantified as described previously (Harris et al., 2015).

1096

### 1097 **RNA extraction and library preparation for RNA sequencing**

1098 RNA was extracted from the adult heads (5-7 days post-pupation) of heterozygous mutants of four  
1099 genotypes (*ASHIL/+* and *WDFY3/+* and *CHD2/+* and *CHD8/+*) and wild types with four biological  
1100 replicates per group by using Lexogen's RNA Extraction Kit (Lexogen). RNA quality was checked with  
1101 Bioanalyzer (Agilent Technologies Inc.) prior to library amplification. 3'mRNA-Seq Library Prep Kit for  
1102 Illumina (FWD) from Lexogen was used for first strand cDNA, second strand synthesis, dsDNA  
1103 purification, i7 single indexing, library amplification and final library purification. To estimate the PCR  
1104 cycle numbers for library amplification, qPCR was done by using PCR Add-On Kit (Lexogen). Purified  
1105 final libraries were quality tested by using Agilent Bioanalyzer 2100 with High Sensitivity DNA chips  
1106 (Agilent Technologies Inc.). Qubit fluorometer (ThermoFisher Scientific) was used to quantify the  
1107 concentration of the final library. Barcoded libraries are then sequenced using an Illumina HiSeq 4000 at  
1108 50bp single-end reads in the CAT genomic facility at UCSF. There was a median of 14.3 million (M)  
1109 mapped reads per sample (interquartile range, IQR: 8.0M-20.6M).

1110

### 1111 **Read mapping and quantification of gene expression**

1112 Read count and transcript per million reads mapped (TPM) were determined using Salmon software  
1113 version 0.12.0. A reference genome index for Salmon was created according to developer's instructions  
1114 for the *Drosophila Melanogaster* genome BDGP6 (Ensembl v92). Reads mapping and quantitation was  
1115 simultaneously performed to individual transcripts.

1116

### 1117 **Differential expression across heterozygous mutant flies**

1118 Differential expression of heterozygous mutant flies was determined by pooling samples from the  
1119 same genotype. Gene expression profiles between mutant and wild type were collated using the R  
1120 package tximport (version 1.6.0). The R package DESeq2 (version 1.18.1) used raw gene counts to  
1121 determine differentially expressed genes (DEGs) by genotype with the linear model [Gene counts ~ Batch

1122 + Genotypes]. Protein coding and lincRNA genes defined by the BDGP6 were included in differential  
1123 expression. Expression was adjusted for batch to account for difference between fly lines, tissue source,  
1124 and library preparation. The p-values were adjusted for Benjamini-Hochberg Procedure through DESeq2  
1125 with a target alpha = 0.1, and genes were considered DEGs at FDR<0.05 and  $\pm 50\%$  expression changes.  
1126

### 1127 **Single cell Patch-seq**

1128 To obtain the cytoplasmic content of the cell, we performed whole-cell tight-seal patch clamp in  
1129 motoneurons expressing GFP (Kulik et al., 2019). We established whole-cell configuration with leak  
1130 currents less than 100pA. We gently sucked the cytoplasmic content of the cell by applying a negative  
1131 pressure to the patch-pipette. Then, we pulled the individual motoneuron from the tissue while visually  
1132 confirming the GFP fluorescent signal at the tip of the pipette. Immediately after, we immersed the pipette  
1133 tip in a test tube containing the Cell Lysis Buffer and RNase inhibitor medium and broke the pipette tip  
1134 by gently touching to the tube wall. The content of the pipette tip was ejected by applying positive  
1135 pressure. We pooled 4-8 motoneurons for one reaction.

1136 We used the Low Input RNA: cDNA Synthesis, Amplification and Library Generation kit from  
1137 NEB (New England Biolabs Inc.) to isolate, reverse-transcribe the RNA and prepare the libraries for  
1138 sequencing. Following the reverse transcription and template switching, we amplified the cDNA by PCR.  
1139 Amplified cDNA was cleaned up by using SPRI beads. The quality and quantity of the amplified cDNA  
1140 was assessed by Bioanalyzer (Agilent Technologies Inc.). After fragmentation and adaptor ligation,  
1141 adaptor-ligated DNA were enriched with i7 primer and universal primer by PCR-amplification. Amplified  
1142 libraries were quality checked by Biolanalyzer with High Sensitivity DNA chips (Agilent Technologies  
1143 Inc.) and the quantity was measured by Qubit fluorometer (ThermoFisher Scientific). Barcoded libraries  
1144 were sequenced using an Illumina HiSeq 4000 at 100bp paired-end reads in the CAT genomic facility at  
1145 UCSF.

1146

### 1147 **Patch-seq transcriptional analysis**

1148 Raw reads were first processed with flexbar version 3.5.0 (<https://github.com/seqan/flexbar>) to  
1149 remove adapters specific to the NEBNext library prep, using parameters as described in  
1150 <https://github.com/nebiolabs/nebnext-single-cell-rna-seq>. The reads were then processed with HTStream  
1151 v.1.1.0 (<https://ibest.github.io/HTStream/>) to perform data QA/QC, remove Illumina adapter  
1152 contamination, PCR duplicates, and low-quality bases/sequences.

1153 The trimmed reads were aligned to the *Drosophila melanogaster* genome v.BDGP6.22  
1154 ([http://ensembl.org/Drosophila\\_melanogaster/Info/Annotation](http://ensembl.org/Drosophila_melanogaster/Info/Annotation)) with annotation release version 98 using  
1155 the aligner STAR v. 2.7.0e (Dobin, et al. 2013, Reference at

1156 <https://www.ncbi.nlm.nih.gov/pubmed/23104886>) to generate raw counts per gene. On average, 93.7% of  
1157 the trimmed reads aligned to the Drosophila genome, and 80% of the trimmed reads uniquely aligned to  
1158 an annotated Drosophila gene.

1159 Differential expression analyses were conducted using limma-voom in R (limma version 3.40.6,  
1160 edgeR version 3.26.7, R 3.6.1). Prior to analysis, genes with fewer than 5 counts per million reads in all  
1161 samples were filtered, leaving 8598 genes. The differential expression analysis was conducted  
1162 independently for the two experiments represented in the samples.

1163

#### 1164 **qPCR**

1165 RNA was extracted from third-instar larval CNS or adult heads (5-7 days post-pupation) with RNeasy  
1166 Plus Micro kit (Qiagen). RNA isolation was followed with DNase digestion with Turbo DNA-free  
1167 (Ambion). For the first strand synthesis Super Script II RT was used (Invitrogen). Taqman Fast Universal  
1168 PCR solution was mixed with TaqMan probe with an Applied Biosystems FAM dye. RPL32 was  
1169 amplified as an internal control. Expression fold-changes are quantified by ddCT method. Data represent  
1170 three biological and three technical replicates.

1171

#### 1172 **Electron Microscopy**

1173 Electron microscopy experiments were performed as previously described (Harris et al., 2015). For high-  
1174 frequency stimulation experiments, larval fillet preparations were fixed immediately (1-5 seconds)  
1175 following stimulation. Data are acquired from at least two animals.

1176

#### 1177 **Statistical analysis of physiology and morphology data**

1178 Average values are presented as mean  $\pm$  standard error of mean. All statistical tests are indicated in the  
1179 figure legends, referring to individual panels within the figure. For multiple comparisons, we used one-  
1180 way ANOVA, followed by Dunnett's or Tukey multiple comparisons. To test the difference between two  
1181 groups, we used unpaired two-tailed Student's t-test. Pearson correlation coefficients were calculated  
1182 following a linear-fit of the X-Y (quantal size vs. quantal content) data, although supra-linear best-fits are  
1183 sometimes displayed, purely for the purpose of display.

1184

1185 **Supplemental Information**

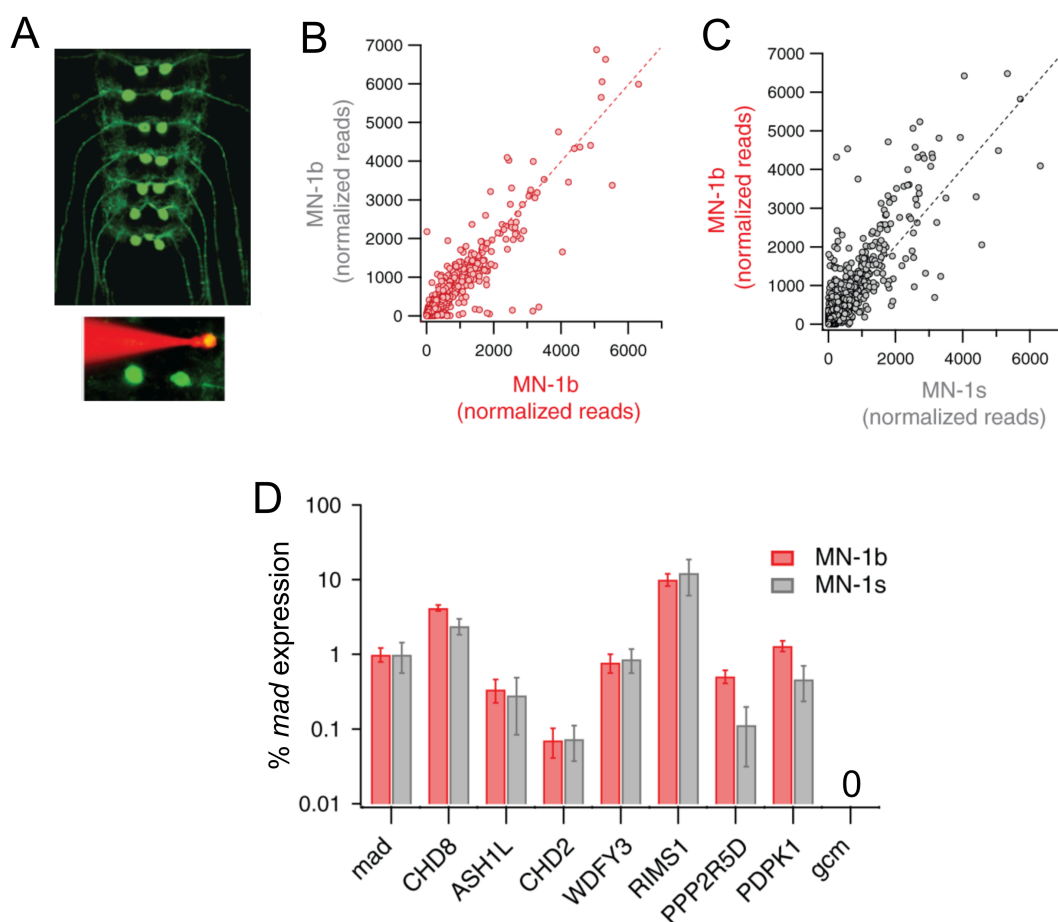

1186  
1187  
1188  
1189  
1190  
1191  
1192  
1193  
1194  
1195  
1196  
1197  
1198  
1199

**Figure S1: Patch-Seq analysis of gene expression in type 1b and type 1s motoneurons.**

**A**, Image of the larval central nervous system with expression of *UAS-CD8-GFP* driven by *MNI-GAL4*. Inset, a rhodamine filled patch electrode targets a single identified motoneuron for excision and sequencing (see methods). **B**, Differential gene expression analysis for two different experiments comparing MN1b (3 biological replicates each). Most data rely on unity as expected. **C**, Comparison of gene expression for type 1b and type 1s motoneurons. **D**, Expression analysis of ASD gene orthologs in type 1b and type 1s motoneurons in the third larval instar taken from the patch seq data. Expression is normalized to the well-established, motoneuron-expressed transcription factor *mothers against decapentaplegic* (*mad*). As confirmation of predicted gene expression we note the absence of expression for *glial cells missing* (*gcm*).

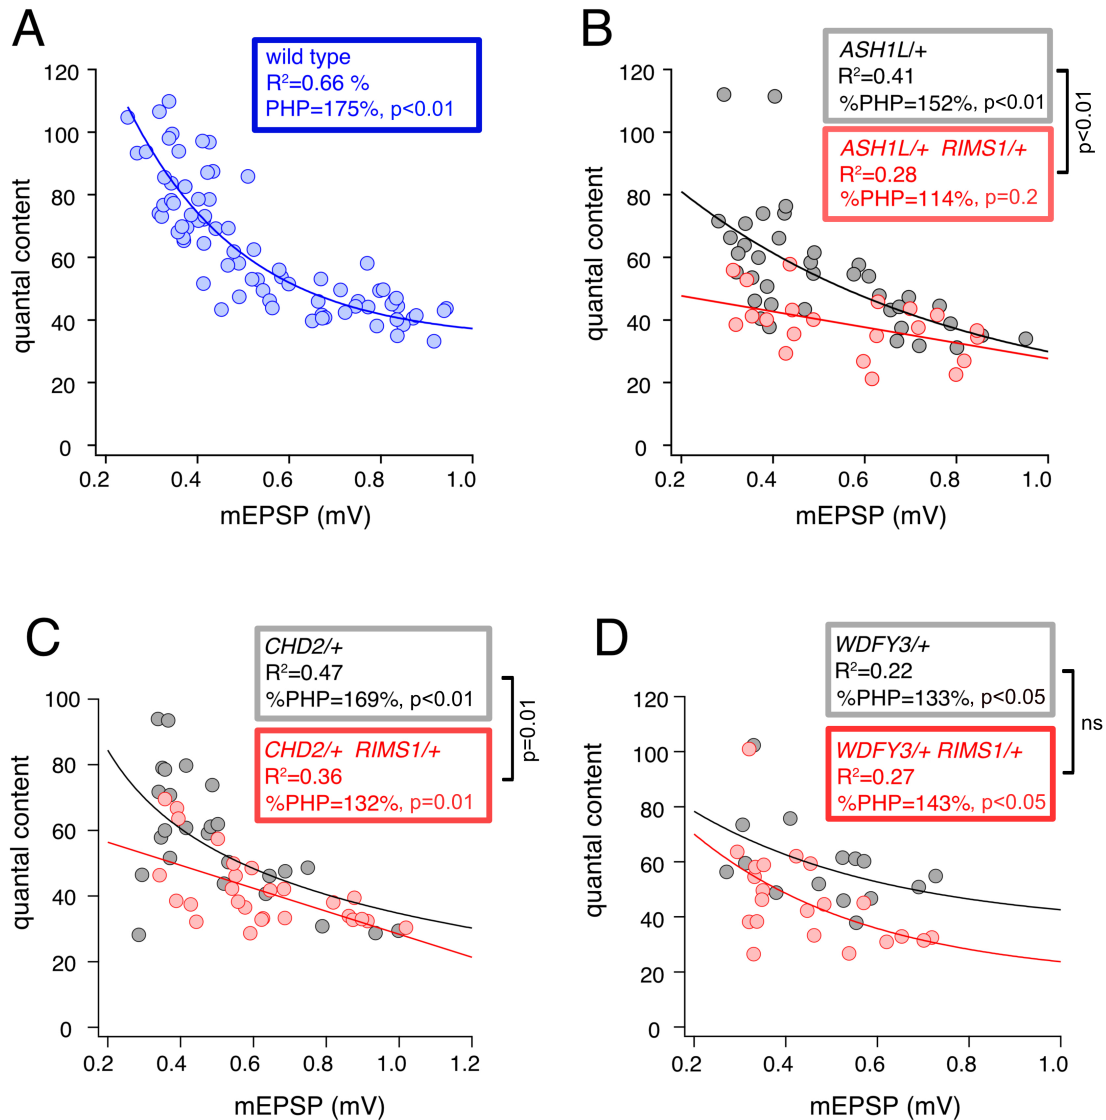

1200  
1201  
1202  
1203  
1204  
1205  
1206  
1207  
1208  
1209  
1210  
1211

**Figure S2: Double-heterozygous gene mutation combinations impair homeostatic plasticity.**

**A-D**, Scatter plots of quantal content (*y* axis) versus mEPSP amplitude (*x* axis) for **A**, *wild type*; **B**, *ASH1L*<sup>+/+</sup>, *RIMS1*<sup>+/+</sup> double heterozygous mutant (red) and *ASH1L*<sup>+/+</sup> heterozygous mutant (grey); **C**, *CHD2*<sup>+/+</sup>, *RIMS1*<sup>+/+</sup> double heterozygous mutant (red) and *CHD2*<sup>+/+</sup> heterozygous mutant (grey); **D**, *WDFY3*<sup>+/+</sup>, *RIMS1*<sup>+/+</sup> double heterozygous mutant (red) and *WDFY3*<sup>+/+</sup> heterozygous mutant (grey). Each symbol represents an individual muscle recording. Exponential and line data fits (straight line,  $R^2$ -value inset). Boxes show statistics for curve fits and percent PHP expression (plus/minus PhTx). P-values within boxes report the statistical significance of PHP over genotypic baseline. P-values outside boxed compare PHP expression between genotypes.

One-way ANOVA with Dunnett's multiple comparisons test (compared to W1118)

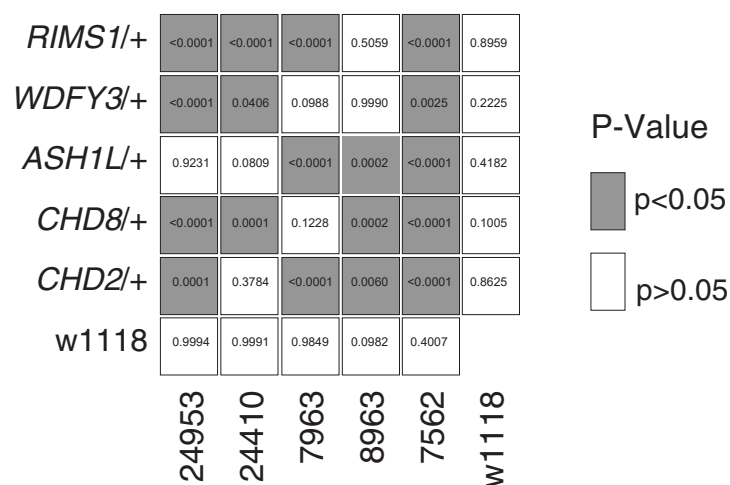

1212  
1213  
1214  
1215  
1216  
1217  
1218  
1219  
1220  
1221  
1222

**Figure S3: One-way ANOVA with Dunnett's multiple comparisons test (compared to w188)**

Genetic interaction matrix showing color-coded p-values from One-way ANOVA with Dunnett's multiple comparisons test. Each individual box represents p-values for the comparison of percent change in quantal content for a double-heterozygous mutant at intersection of x and y axes against wild type (*w1118*). Values are according to lookup codes at right (gray color indicates genotypes which have statistically significant difference, white color indicates no difference compared to *w1118*). **Note** that all comparisons indicated in gray are highly statistically significant with  $p < 0.001$ , with the exception of two matrix element: *Df(24410)/+* with *WDFY3/+* is  $p = 0.0406$  and *Df(7562)/+* with *WDFY3/+* is  $p = 0.0025$ .



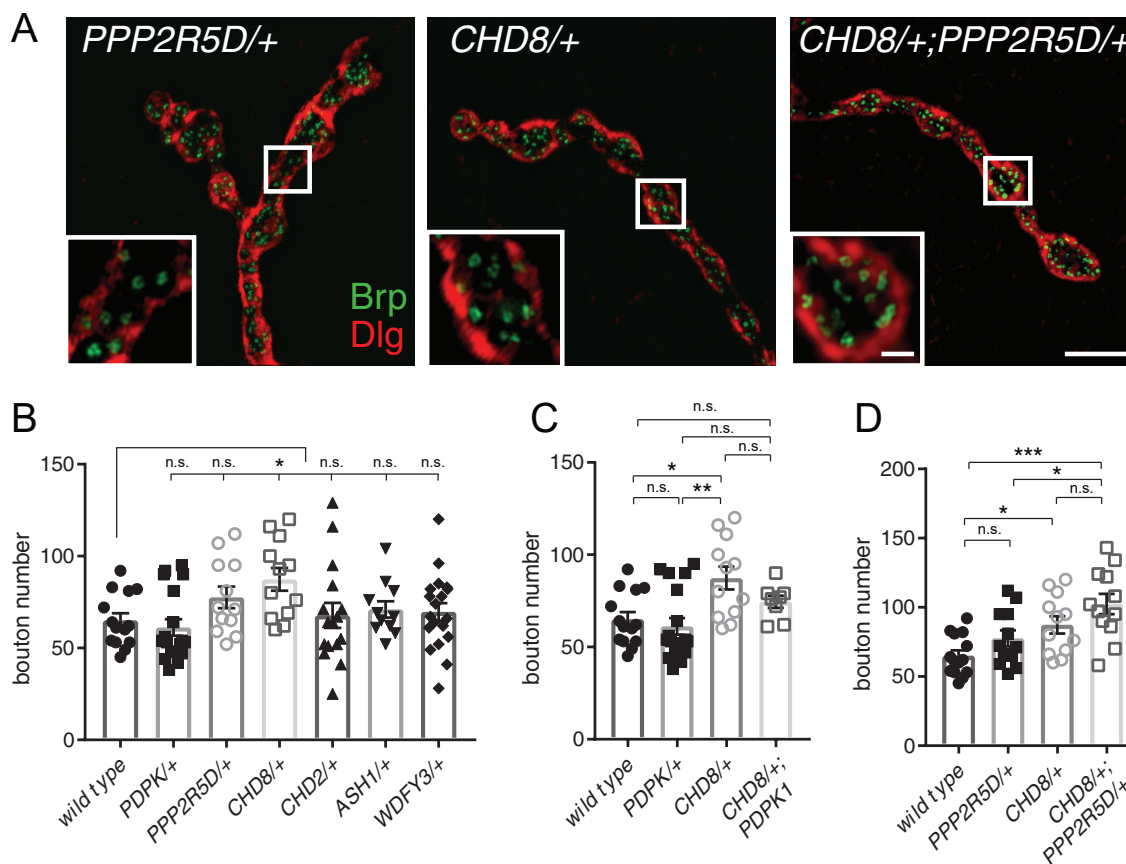

1223  
1224  
1225  
1226  
1227  
1228  
1229  
1230  
1231  
1232  
1233  
1234  
1235

**Figure S4: Analysis of the NMJ morphology**

**A**, Structured illumination microscopy (SIM) images of neuromuscular junction for indicated genotypes. Insets show single confocal sections. Staining for anti-Brp (green) to mark active zones and anti-Dlg (red) to mark postsynaptic membranes. Scale bars: 5 $\mu$ m and 1 $\mu$ m (inset). **B**, Quantification of bouton number from NMJ (abdominal segments 2 and 3) for the indicated genotypes. One-way ANOVA, Dunnett's multiple comparisons, n.s p>0.05; \* p<0.05 **C-D**, Data repeated from (**B**) highlighting specific comparisons for genotypes involving the heterozygous *CHD8/+* mutation. One-way ANOVA, Tukey's multiple comparisons, n.s p>0.05; \* p<0.05; \*\* p<0.01; \*\*\* p<0.001. Data acquired and analyzed blind to genotype.

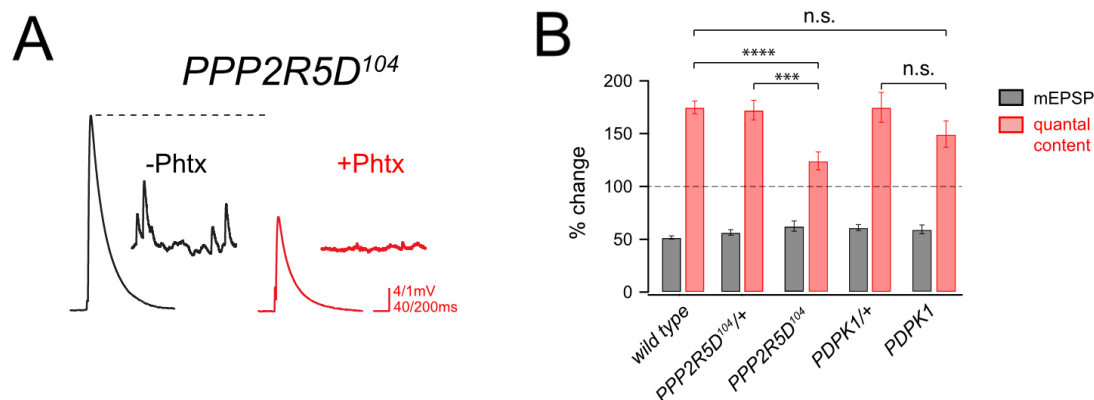

1236  
1237  
1238  
1239  
1240  
1241  
1242  
1243  
1244

**Figure S5: A *PPP2R5D* loss-of-function mutation disrupts PHP, but PDPK1 does not.**

**A**, Representative mEPSP and EPSP traces for *PPP2R5D*<sup>104</sup> homozygous mutant (-/+ PhTx) **B**, Percent change in mEPSP amplitude (gray bars) and quantal content (red bars) with PhTx compared to baseline for the indicated genotypes. Pairwise comparisons for each genotype (+/- PhTX), Student's t-test, two tailed; n.s.  $p > 0.05$ ; \*\*\*  $p < 0.001$ ; \*\*\*\*  $p < 0.0001$ .

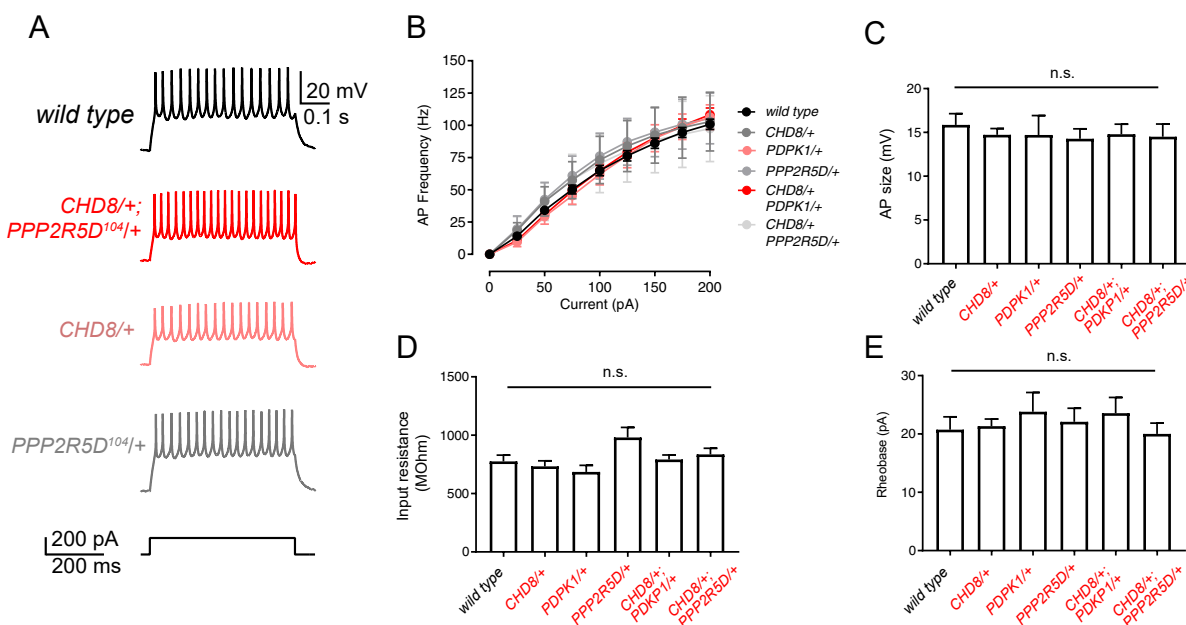

1245  
1246  
1247  
1248  
1249  
1250  
1251  
1252  
1253

**Figure S6: Firing properties of motoneurons are not different in a double heterozygous mutant**

**A**, Representative traces for motoneuron firing upon injection of 200pA step current across indicated genotypes. **B**, Action potential frequency is plotted against current injection amplitude for wild type and mutant as indicated. **C-E**, Quantitation of action potential amplitudes, input resistance and rheobase for wild type and indicated genotypes. One-way ANOVA and Tukey's multiple comparisons (n.s. statistically not different,  $p > 0.05$ ).

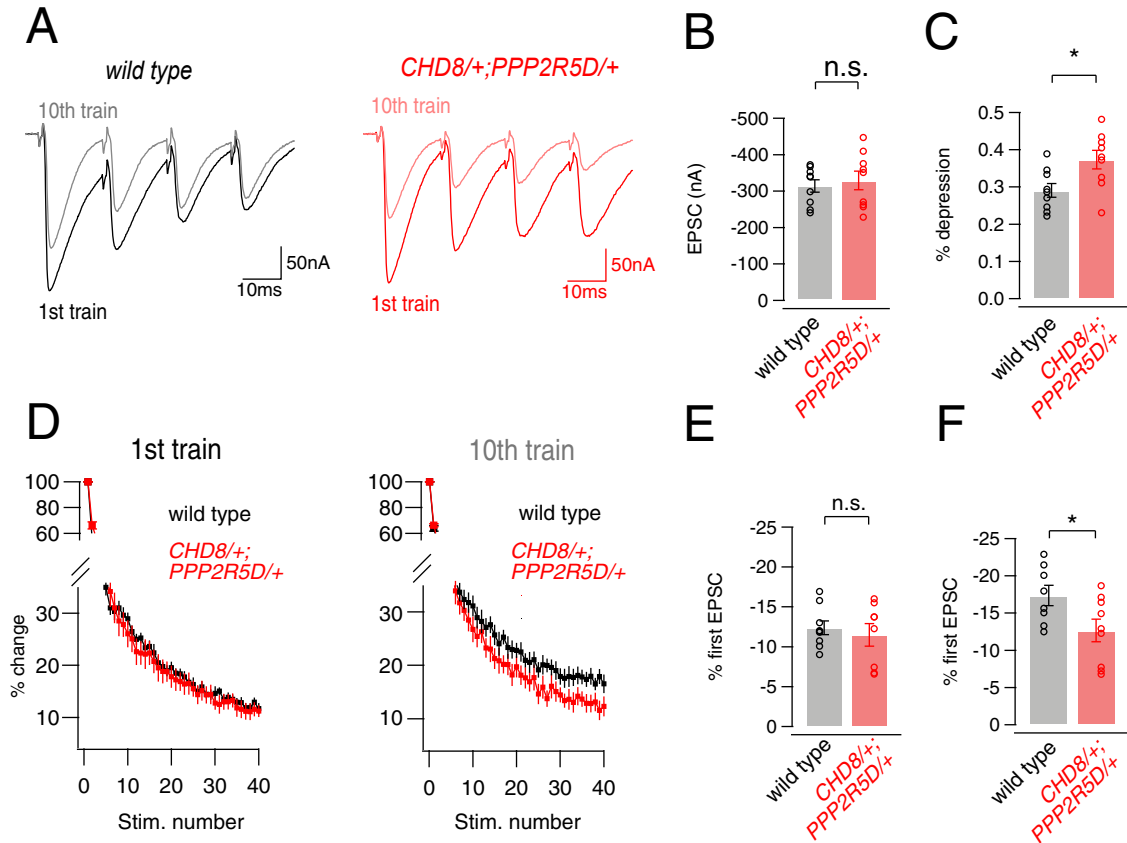

1254  
1255  
1256  
1257  
1258  
1259  
1260  
1261  
1262  
1263  
1264

**Figure S7: Analysis of short-term depression in *CHD8/+; PPP2R5D/+* double heterozygote**

**A**, Representative traces for EPSCs following 50Hz stimulation (40 stimuli, 1<sup>st</sup> four shown for purposes of display) from *wild type* and the *CHD8/+; PPP2R5D/+* double heterozygous mutant. The first four EPSCs of the 1<sup>st</sup> and 10<sup>th</sup> trains are overlaid. **B**, Quantitation of first EPSC amplitudes. **C**, Percent depression of first EPSC comparing the 1<sup>st</sup> and 10<sup>th</sup> trains. **D**, Percent change (compared to first EPSC) for EPSC amplitudes during the train are plotted for *wild type* and double heterozygous mutant animal, as indicated. **E**, Quantification of the percent change in EPSC shown in **D** for the first train. **F**, percent depression of first EPSC after 10 trains. Student's t-test, two tailed; n.s. p > 0.05; \* p < 0.05

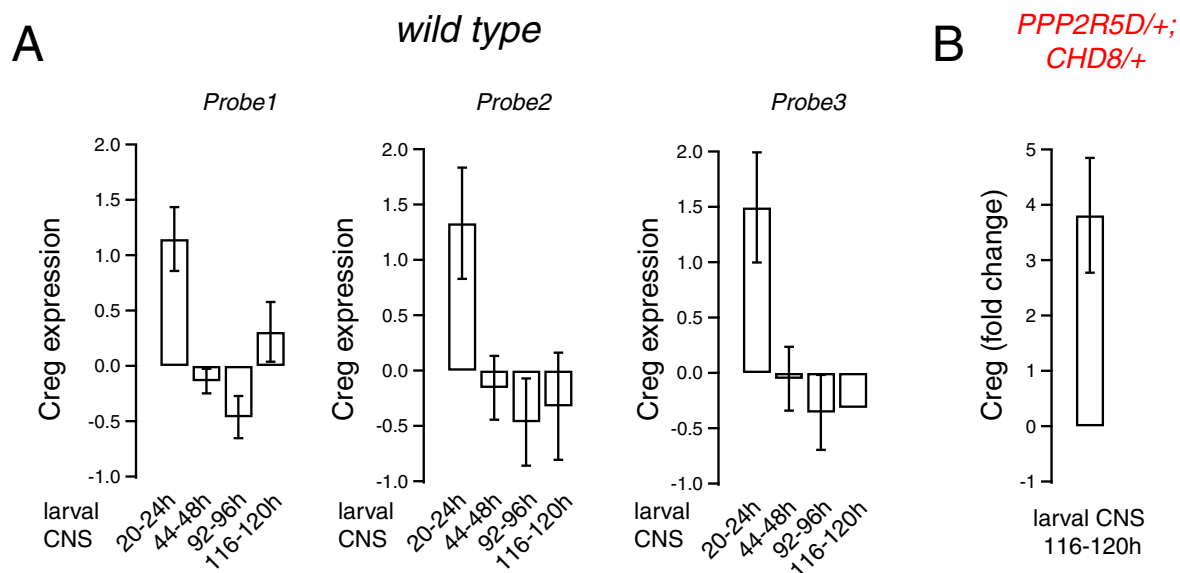

1265

1266

1267

**Figure S8: Expression levels of CREG during *Drosophila* larval development**

1268

**A**, CREG expression levels measured in larval CNS by microarray (log2) across different developmental

1269

time points with three different probes (see 57). **B**, Quantification of CREG expression levels for the

1270

*CHD8/+; PPP2R5D/+* double mutant compared to *wild type* by qPCR (tissue source is larval CNS).

1271

1272

1273

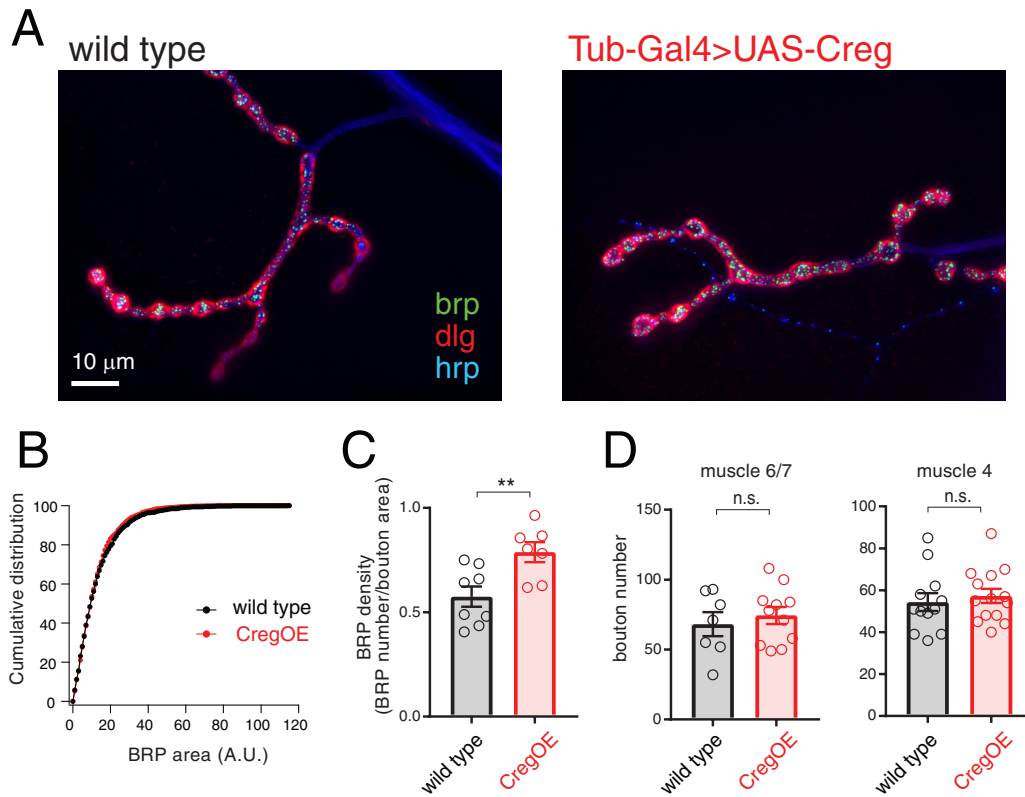

1274  
1275  
1276  
1277  
1278  
1279  
1280  
1281  
1282

**Figure S9: CREG overexpression does not substantively alter NMJ anatomy.**

**A**, Immunostaining of *wild type* (left) and *Tub-Gal4>UAS-Creg* (right; CregOE) larval NMJ for Brp, DLG and HRP as indicated. **B**, Cumulative distribution plot of BRP area for *wild type* (black) and CregOE. **C**, Quantification of BRP density calculated by dividing the number of BRP positive puncta to the number of boutons. **D**, Quantification of bouton numbers in muscle 6/7 (left) and muscle 4 (right) for the wild type (black) and CregOE (red). Student's t-test, two tailed; n.s.  $p > 0.05$ ; \*\*  $p < 0.01$



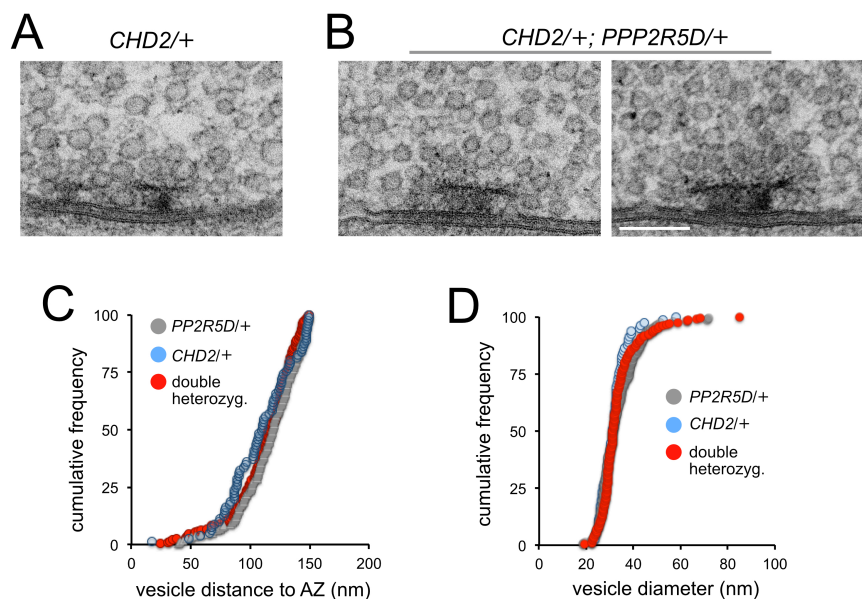

1283  
1284  
1285  
1286  
1287  
1288  
1289  
1290  
1291  
1292  
1293  
1294

**Figure S10: Ultrastructure analysis of the *CHD2/+; PDPK1/+* double heterozygous mutant.**

**A**, Representative example of the *CHD2/+* single heterozygous mutant NMJ. **B**, Two representative examples of the double heterozygous mutant. The membranes of the synaptic cleft are clearly defined as are clusters of synaptic vesicles of typical morphology and the electron dense T-bar structures. **C**, Quantification of vesicle distance to the active zone for all vesicles within 150nm radius of the T-bar centroid. **D**, Quantification of the distribution of synaptic vesicle sizes for the indicated genotypes.

1295  
1296

**Table S1. Deficiencies used in primary forward genetic screen.**

| (Bloomington Stock ID) |      |      |      |       |       |
|------------------------|------|------|------|-------|-------|
| 7562                   | 7614 | 7681 | 7977 | 9538  | 24927 |
| 7564                   | 7616 | 7682 | 7980 | 9607  | 24952 |
| 7565                   | 7619 | 7692 | 7981 | 9608  | 25116 |
| 7567                   | 7620 | 7694 | 7983 | 9697  | 25117 |
| 7571                   | 7621 | 7731 | 7990 | 9700  | 25123 |
| 7572                   | 7622 | 7734 | 7992 | 9701  | 25388 |
| 7574                   | 7624 | 7737 | 7994 | 9720  | 25389 |
| 7576                   | 7635 | 7742 | 7997 | 9721  | 25413 |
| 7577                   | 7637 | 7743 | 8057 | 23148 | 25444 |
| 7578                   | 7638 | 7746 | 8061 | 23315 | 25688 |
| 7580                   | 7641 | 7921 | 8063 | 23674 | 25694 |
| 7584                   | 7644 | 7922 | 8068 | 24138 | 26505 |
| 7585                   | 7648 | 7927 | 8070 | 24140 | 26507 |
| 7586                   | 7649 | 7929 | 8074 | 24342 | 26534 |
| 7588                   | 7652 | 7930 | 8083 | 24343 | 26538 |
| 7589                   | 7653 | 7937 | 8097 | 24344 | 26832 |
| 7591                   | 7657 | 7938 | 8100 | 24387 | 26833 |
| 7594                   | 7658 | 7947 | 8963 | 24392 | 26839 |
| 7595                   | 7659 | 7951 | 8970 | 24393 | 27346 |
| 7596                   | 7660 | 7952 | 8973 | 24409 | 27361 |
| 7600                   | 7662 | 7953 | 8974 | 24410 | 27362 |
| 7601                   | 7664 | 7957 | 8976 | 24414 | 27368 |
| 7602                   | 7666 | 7958 | 9071 | 24415 | 27369 |
| 7609                   | 7672 | 7959 | 9214 | 24417 | 27375 |
| 7610                   | 7674 | 7961 | 9292 | 24909 | 27580 |
| 7611                   | 7675 | 7963 | 9497 | 24920 | 27912 |
| 7612                   | 7676 | 7975 | 9499 | 24921 | 28827 |
| 7613                   | 7680 | 7976 | 9500 | 24926 | 29027 |

1297

**Table S2:**  
**Average mEPSP, EPSP and quantal content values for the Figure 1 and Figure 4**

| Genotype      | mEPSP (-/+PhTx) | P-value  | EPSP (-/+PhTx) | P-Value  | Quantal Content (-/+PhTx) | P-value  | n (-PhTx) | n (+ PhTx) |
|---------------|-----------------|----------|----------------|----------|---------------------------|----------|-----------|------------|
| w1118/+       | 0.77 / 0.40     | 4.07E-19 | 33.3 / 29.7    | 0.00275  | 44.14 / 77.1              | 4.38E-17 | 47        | 36         |
| 7562/+        | 0.76 / 0.41     | 2.21E-06 | 34.1 / 22.1    | 0.00114  | 44.8 / 57.5               | 0.09556  | 6         | 7          |
| 8963/+        | 0.81 / 0.37     | 4.26E-08 | 35.7 / 21.8    | 3.10E-07 | 44.2 / 58.9               | 0.00064  | 8         | 10         |
| 7963/+        | 0.84 / 0.34     | 1.36E-10 | 28.8 / 23.4    | 0.31996  | 35.2 / 68.3               | 0.00301  | 8         | 8          |
| 24410/+       | 0.81 / 0.34     | 1.63E-07 | 31.3 / 21.8    | 0.00434  | 39.5 / 65.3               | 0.00029  | 8         | 11         |
| 24953/+       | 0.80 / 0.41     | 4.71E-14 | 26.1 / 22.9    | 0.19476  | 33.2 / 56.1               | 6.10E-05 | 13        | 15         |
| CHD2/+        | 0.85 / 0.4      | 0.000104 | 28.67 / 25.63  | 0.27     | 36.16 / 64.33             | 0.00003  | 8         | 19         |
| CHD2+;7562/+  | 0.69 / 0.37     | 1.02E-07 | 30.7 / 14.2    | 1.70E-05 | 44.6 / 38.0               | 0.19615  | 4         | 10         |
| CHD2+;8963/+  | 0.69 / 0.37     | 0.00015  | 26.8 / 17.4    | 0.00358  | 38.6 / 47.0               | 0.00919  | 7         | 11         |
| CHD2+;7963/+  | 0.68 / 0.43     | 0.025    | 27.4 / 15.8    | 0.0006   | 43.3 / 39.0               | 0.5305   | 7         | 8          |
| CHD2+;24410/+ | 0.96 / 0.44     | 0.00001  | 31.9 / 19.1    | 0.0098   | 32.8 / 45.1               | 0.122    | 8         | 7          |
| CHD2+;24953/+ | 0.93 / 0.48     | 0.00121  | 21.14 / 12.66  | 0.00282  | 23.9 / 26.3               | 0.56128  | 8         | 12         |
| CHD8/+        | 0.61 / 0.41     | 0.00461  | 29.90 / 25.82  | 0.09814  | 51.3 / 66.3               | 0.04464  | 7         | 8          |
| CHD8+;7562/+  | 0.48 / 0.45     | 0.50201  | 23.76 / 21.60  | 0.3212   | 52.1 / 48.8               | 0.6747   | 8         | 10         |
| CHD8+;8963/+  | 0.78 / 0.46     | 0.00061  | 29.89 / 20.89  | 0.00306  | 38.8 / 46.6               | 0.02838  | 9         | 17         |
| CHD8+;7963/+  | 0.63 / 0.35     | 2.23E-06 | 23.76 / 18.74  | 0.00843  | 41.1 / 53.7               | 0.06365  | 8         | 11         |
| CHD8+;24410/+ | 0.65 / 0.33     | 0.00041  | 24.91 / 16.97  | 8.70E-05 | 39.0 / 44.4               | 0.21624  | 6         | 14         |
| CHD8+;24953/+ | 0.60 / 0.41     | 1.57E-06 | 21.50 / 16.61  | 0.01199  | 36.8 / 41.2               | 0.26813  | 16        | 16         |

1298

|                 |                       |          |                      |          |                      |          |    |    |
|-----------------|-----------------------|----------|----------------------|----------|----------------------|----------|----|----|
| WDFY3/+         | 0.578875/<br>0.368429 | 0.00103  | 29.7445 /<br>24.8531 | 0.29837  | 51.3489 /<br>68.0381 | 0.05123  | 8  | 7  |
| WDFY3/+;7562/+  | 0.670429/<br>0.318    | 0.00269  | 25.0508 /<br>14.2743 | 0.00314  | 40.3664 /<br>44.5645 | 0.51348  | 7  | 8  |
| WDFY3/+;8963/+  | 0.730111/<br>0.430333 | 4.05E-07 | 30.0532 /<br>24.3018 | 0.13024  | 33.3252 /<br>54.1519 | 0.00977  | 7  | 7  |
| WDFY3/+;7963/+  | 0.59445/<br>0.46625   | 0.00126  | 27.4833 /<br>27.5498 | 0.982    | 45.8709 /<br>59.252  | 0.0209   | 8  | 11 |
| WDFY3/+;24410/+ | 0.607125/<br>0.403375 | 0.00138  | 24.0743 /<br>19.645  | 0.09596  | 40.0525 /<br>49.6069 | 0.10056  | 8  | 8  |
| WDFY3/+;24953/+ | 0.64075/<br>0.383667  | 1.06E-05 | 22.9389 /<br>10.849  | 0.00472  | 35.601 /<br>28.4719  | 0.21712  | 8  | 9  |
| RIMS1/+         | 0.7256/<br>0.403444   | 1.15E-11 | 27.4848 /<br>25.1122 | 0.02848  | 38.5025 /<br>64.3644 | 5.10E-09 | 20 | 30 |
| RIMS1/+;7562/+  | 0.670143/<br>0.407667 | 0.00092  | 18.5703 /<br>12.6346 | 0.00521  | 27.8658 /<br>31.3246 | 0.16438  | 7  | 18 |
| RIMS1/+;8963/+  | 0.730111/<br>0.430333 | 0.01022  | 15.95 /<br>13.3405   | 0.26477  | 22.5791 /<br>31.1187 | 0.05777  | 6  | 9  |
| RIMS1/+;7963/+  | 0.6035/<br>0.350625   | 0.00782  | 25.9351 /<br>11.352  | 0.00105  | 43.0961 /<br>32.0142 | 0.00384  | 4  | 8  |
| RIMS1/+;24410/+ | 0.634/<br>0.336       | 2.54E-07 | 20.6415 /<br>13.2483 | 0.00619  | 33.148 /<br>41.1368  | 0.3635   | 7  | 13 |
| RIMS1/+;24953/+ | 0.609333/<br>0.402143 | 2.32E-05 | 19.3639 /<br>12.3295 | 0.0025   | 31.7789 /<br>28.4743 | 0.32924  | 6  | 7  |
| ASH1L/+         | 0.749/<br>0.39192     | 7.31E-08 | 29.3273 /<br>23.7862 | 0.00382  | 40.3736 /<br>61.5267 | 3.90E-05 | 15 | 25 |
| ASH1L/+;7562/+  | 0.782636/<br>0.368375 | 5.94E-05 | 24.9885 /<br>16.1292 | 0.00438  | 38.4814 /<br>43.5588 | 0.4614   | 11 | 16 |
| ASH1L/+;8963/+  | 0.95325/<br>0.42775   | 0.00209  | 23.7344 /<br>26.0928 | 0.49558  | 24.6505 /<br>61.5039 | 1.40E-05 | 8  | 8  |
| ASH1L/+;7963/+  | 0.630455/<br>0.405792 | 0.00087  | 30.649 /<br>17.4671  | 3.80E-05 | 50.8324 /<br>43.6606 | 0.21246  | 24 | 11 |
| ASH1L/+;24410/+ | 0.7615/<br>0.3755     | 5.55E-05 | 27.9698 /<br>19.6792 | 0.00051  | 37.8419 /<br>53.2772 | 0.00321  | 18 | 10 |
| ASH1L/+;24953/+ | 0.86725/<br>0.414391  | 5.85E-17 | 16.0195 /<br>14.5205 | 0.53663  | 18.6462 /<br>35.4708 | 0.00084  | 23 | 16 |

1299  
1300

1301 **Table S3: Average mEPSP, EPSP and quantal content values for the Figure 5**

| <b>Genotype</b>                 | <b>mEPSP<br/>(/+PhTx)</b> | <b>P-value</b> | <b>EPSP<br/>(/+PhTx)</b>    | <b>P-Value</b> | <b>Quantal<br/>Content<br/>(/+PhTx)</b> | <b>P-value</b> | <b>n<br/>-PhTx</b> | <b>n<br/>+PhTx</b> |
|---------------------------------|---------------------------|----------------|-----------------------------|----------------|-----------------------------------------|----------------|--------------------|--------------------|
| <i>w1118/+; ;<br/>PPP2R5D/+</i> | 0.9224/<br>0.5206         | 1.325E-11      | 30.4016375/<br>29.22530625  | 0.63095        | 33.023/<br>57.017                       | 1.38E-06       | 8                  | 16                 |
| <i>PPP2R5D/+,<br/>RIMS1/+</i>   | 0.7417/<br>0.4137         | 1.1E-07        | 21.70959/<br>15.1710092     | 3.69E-05       | 30.551/<br>36.593                       | 0.026631       | 20                 | 25                 |
| <i>CHD8/+;<br/>PPP2R5D/+</i>    | 0.6489/<br>0.3282         | 1.94E-08       | 27.09809091/<br>14.483      | 1.95E-06       | 42.261/<br>44.564                       | 0.67508        | 11                 | 14                 |
| <i>CHD2/+;<br/>PPP2R5D/+</i>    | 0.8533/<br>0.4376         | 0.056815       | 35.991525/<br>23.04841429   | 0.008342       | 44.365/<br>52.739                       | 0.202834       | 4                  | 7                  |
| <i>WDFY3/+;<br/>PPP2R5D/+</i>   | 0.747/<br>0.4671          | 4.23E-07       | 29.1565 /<br>16.776601      | 0.007575       | 39.171/<br>35.781                       | 0.589219       | 4                  | 10                 |
| <i>PPP2R5D/+,<br/>ASHIL/+</i>   | 0.6745/<br>0.4256         | 0.001933       | 23.14283333/<br>22.3045     | 0.556417       | 35.942/<br>53.071                       | 0.001184       | 6                  | 12                 |
| <i>w1118/+; ;<br/>PDPK1/+</i>   | 0.7028/<br>0.4296         | 6.13E-07       | 26.683/<br>28.143275        | 0.662673       | 37.838 /<br>66.343                      | 0.000951       | 4                  | 8                  |
| <i>PDPK1/+,<br/>RIMS1/+</i>     | 0.7768/<br>0.41872        | 0.00033        | 26.40326/<br>14.0144096     | 1.39E-06       | 36.797/<br>33.149                       | 0.442418       | 10                 | 25                 |
| <i>CHD8/+;<br/>PDPK1/+</i>      | 0.7143/<br>0.4258         | 0.090174       | 24.1224/<br>19.8456         | 0.126857       | 35.584/<br>47.375                       | 0.054873       | 6                  | 8                  |
| <i>CHD2/+;<br/>PDPK1/+</i>      | 0.7285/<br>0.4461         | 2.9E-07        | 31.013825/<br>20.7110125    | 4.55E-07       | 42.250/<br>48.546                       | 0.059572       | 4                  | 8                  |
| <i>WDFY3/+;<br/>PDPK1/+</i>     | 0.7484/<br>0.4719         | 0.000353       | 28.59798182/<br>18.60855556 | 0.798318       | 38.963/<br>42.250                       | 0.001878       | 11                 | 18                 |
| <i>PDPK1/+,<br/>ASHIL/+</i>     | 0.8828/<br>0.5369         | 0.000442       | 23.16445 /<br>23.87097778   | 0.064927       | 28.049/<br>45.030                       | 0.277976       | 12                 | 9                  |
